# Supplementary material for: A novel amphiphilic pincer palladium complex: design, preparation and self-assembling behavior
Source: Royal Society of Chemistry journal article supplement (doi:10.1039/c1dt10556f), 2011-01-01
Supplement: c1dt10556f.pdf [file c1dt10556f.pdf]

## Electronic Supplementary Information

# A Novel Amphiphilic Pincer Palladium Complex: Design, Preparation and Self-Assembling Behavior

*Go Hamasaka, Tsubasa Muto and Yasuhiro Uozumi\**

Institute for Molecular Science, Higashi-yama 5-1, Myodaiji, Okazaki 444-8787, Japan  
The Graduate University for Advanced Studies, Higashi-yama 5-1, Myodaiji, Okazaki 444-8787, Japan  
RIKEN, Hirosawa, Wako 351-0198, Japan

E-mail: [uo@ims.ac.jp](mailto:uo@ims.ac.jp), [uo@riken.jp](mailto:uo@riken.jp)

### <sup>1</sup>H NMR of 4,6-dimethyl-2-methoxymethoxyisophthalic acid dimethyl ester (11)

C:\Documents and Settings\ALPHA\11-11-11\UozumiG\muto\full data\MOM1(TM5061-02-1H).als

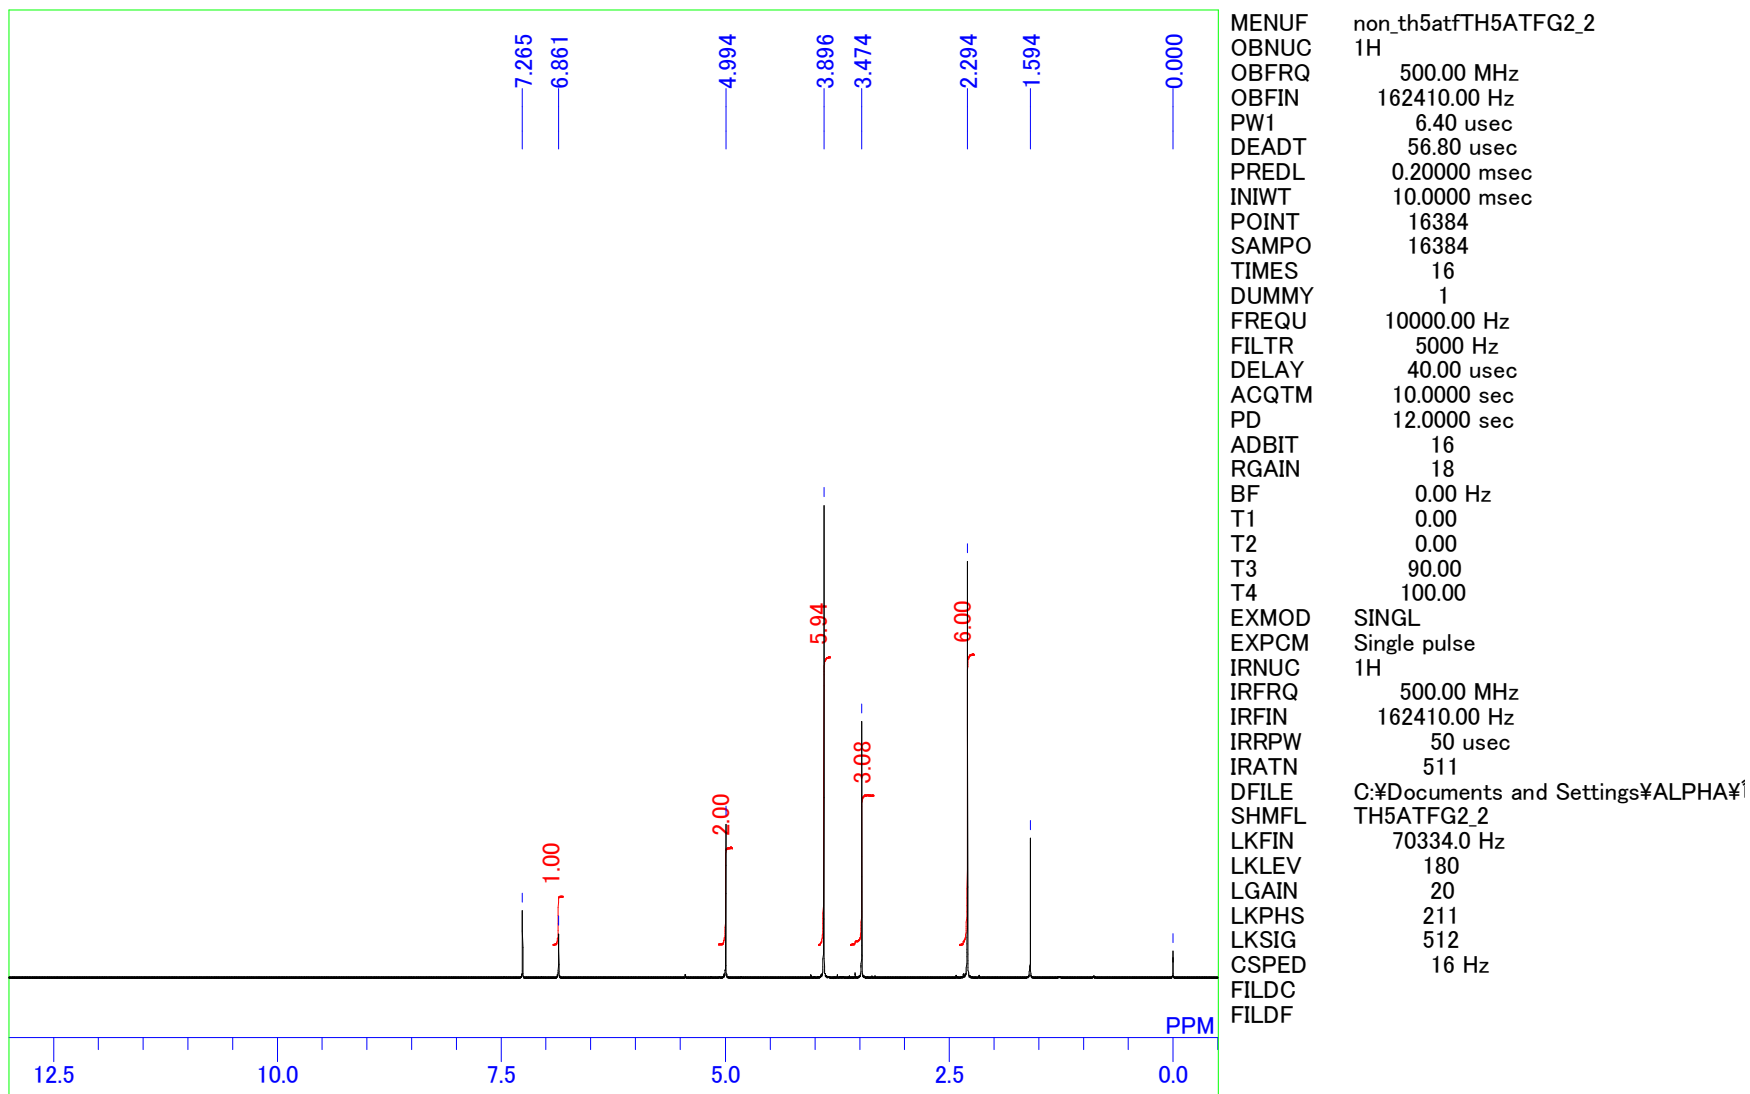

### <sup>13</sup>C NMR of 4,6-dimethyl-2-methoxymethoxyisophthalic acid dimethyl ester (11)

C:\Documents and Settings\ALPHA\11-11-11\UozumiG\muto\TMEXP0500-0599\TM5061-02-13C-f.als

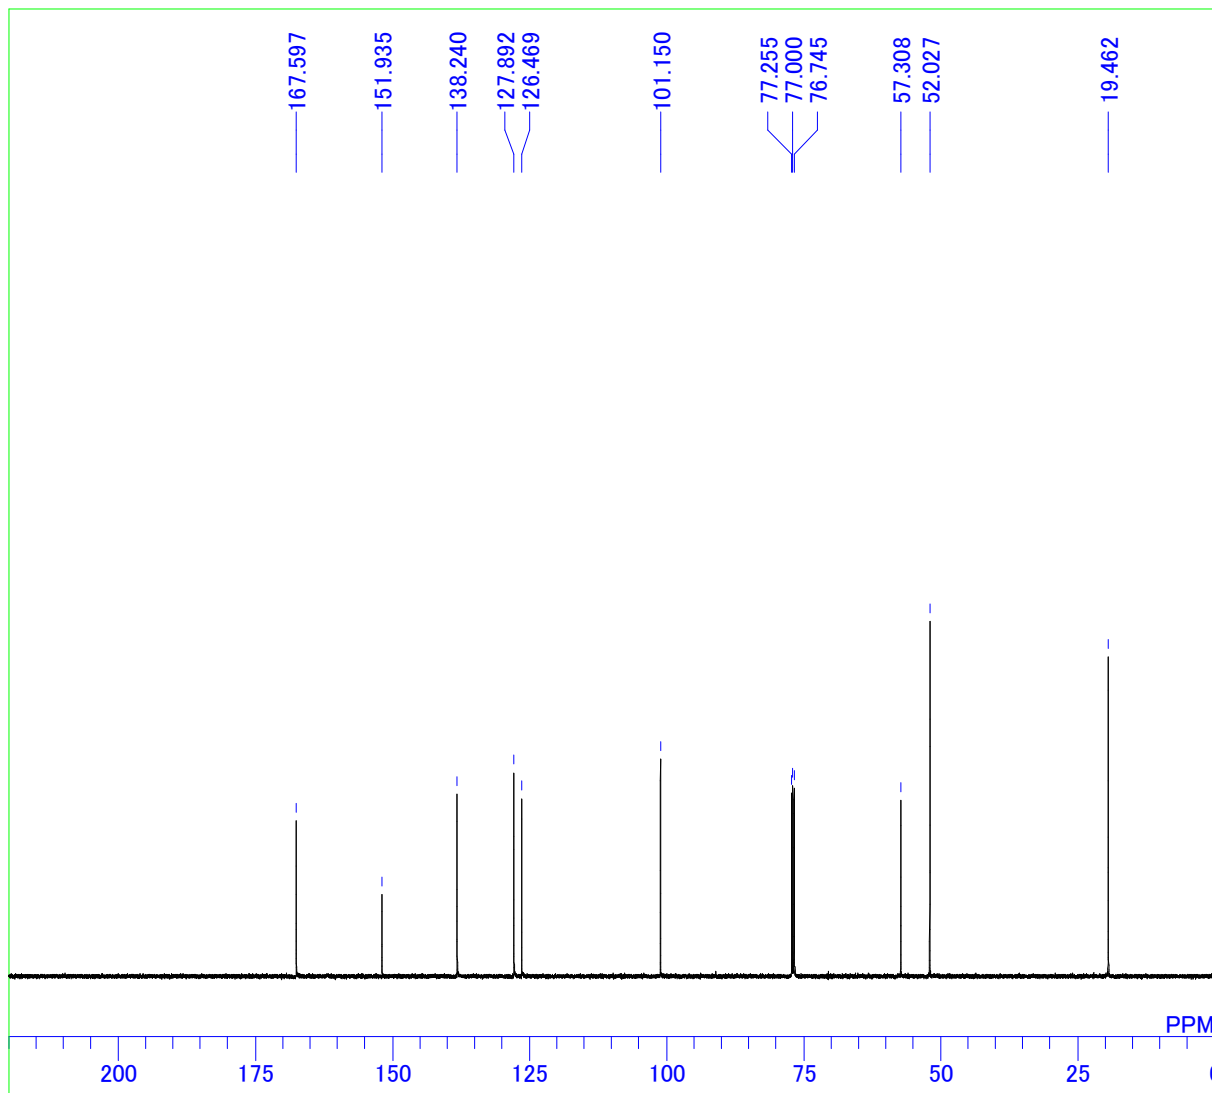

MENUF bcm\_th5atfTH5ATFG2\_2  
OBNUC 13C  
OBFRQ 125.65 MHz  
OBFIN 127958.00 Hz  
PW1 5.75 usec  
DEADT 10.00 usec  
PREDL 0.20000 msec  
INIWT 10.0000 msec  
POINT 32768  
SAMPO 32768  
TIMES 4000  
DUMMY 1  
FREQU 33898.30 Hz  
FILTR 16950 Hz  
DELAY 11.80 usec  
ACQTM 0.9667 sec  
PD 1.0000 sec  
ADBIT 16  
RGAIN 27  
BF 1.00 Hz  
T1 0.00  
T2 0.00  
T3 90.00  
T4 100.00  
EXMOD SINGL  
EXPCM Single pulse  
IRNUC 1H  
IRFRQ 500.00 MHz  
IRFIN 162410.00 Hz  
IRRPW 50 usec  
IRATN 511  
DFILE C:\Documents and Settings\ALPHA\11-11-11\UozumiG\muto\TMEXP0500-0599\TM5061-02-13C-f.als  
SHMFL TH5ATFG2\_2  
LKFIN 70334.0 Hz  
LKLEV 180  
LGAIN 22  
LKPHS 211  
LKSIG 627  
CSPED 12 Hz  
FILDC  
FILDF

### <sup>1</sup>H NMR of 4,6-bis(bromomethyl)-2-methoxymethoxy isophthalic acid dimethyl ester (12)

C:\Documents and Settings\ALPHA\11-11-11\UozumiG\muto\full data\Bromide(TM5062-03-1H).als

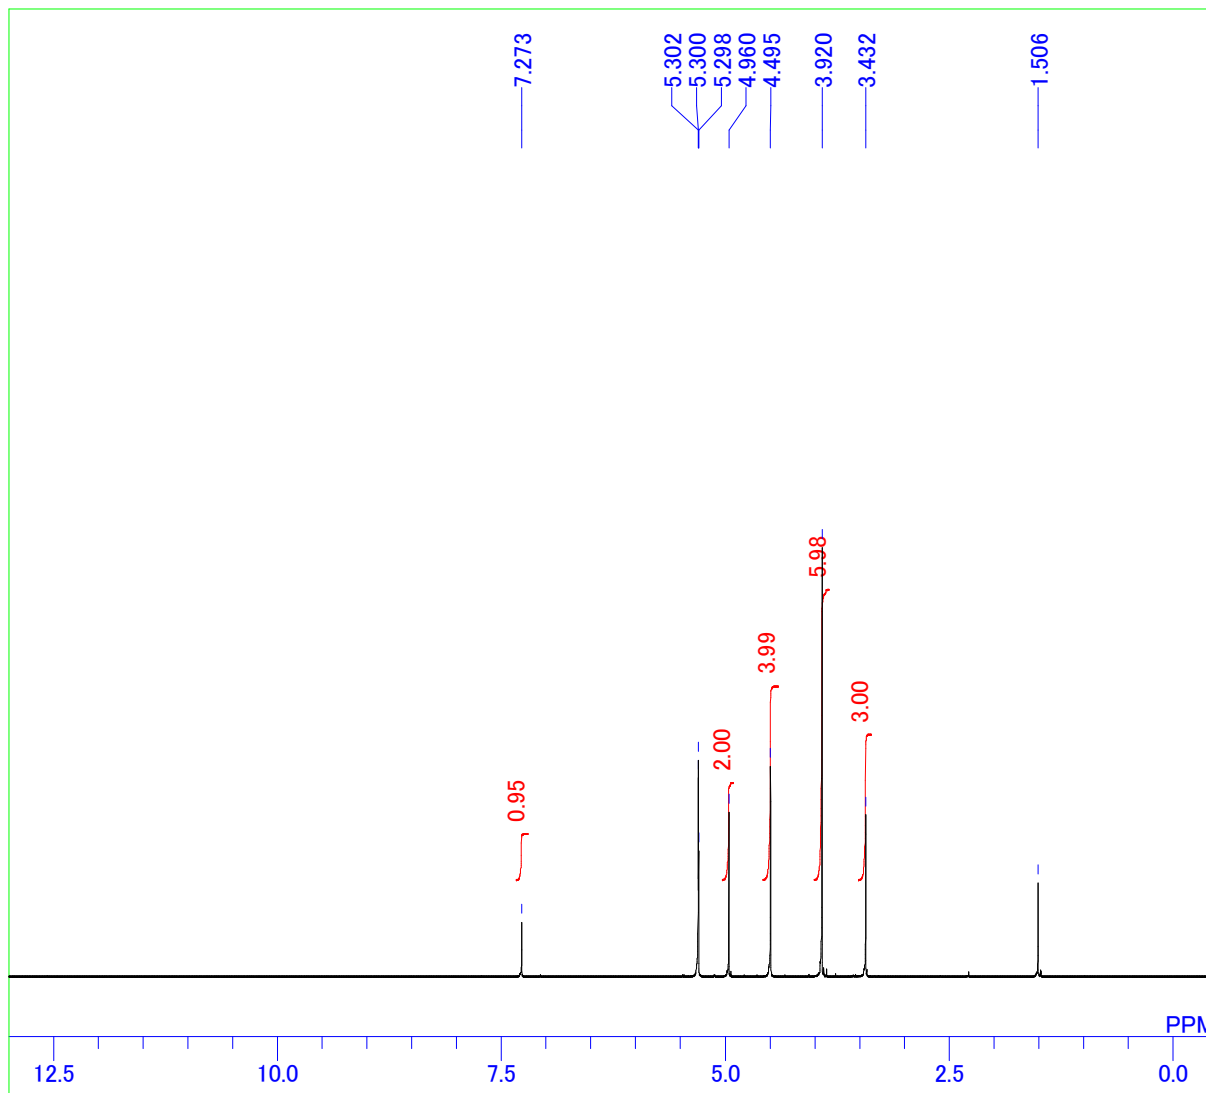

MENUF non\_th5atfTH5ATFG2\_2  
OBNUC 1H  
OBFRQ 500.00 MHz  
OBFIN 162410.00 Hz  
PW1 6.40 usec  
DEADT 56.80 usec  
PREDL 0.20000 msec  
INIWT 10.0000 msec  
POINT 16384  
SAMPO 16384  
TIMES 16  
DUMMY 1  
FREQU 10000.00 Hz  
FILTR 5000 Hz  
DELAY 40.00 usec  
ACQTM 5.0000 sec  
PD 7.0000 sec  
ADBIT 16  
RGAIN 24  
BF 0.00 Hz  
T1 0.00  
T2 0.00  
T3 90.00  
T4 100.00  
EXMOD SINGL  
EXPCM Single pulse  
IRNUC 1H  
IRFRQ 500.00 MHz  
IRFIN 162410.00 Hz  
IRRPW 50 usec  
IRATN 511  
DFILE C:\Documents and Settings\ALPHA\1  
SHMFL TH5ATFG2\_2  
LKFIN 70186.0 Hz  
LKLEV 160  
LGAIN 24  
LKPHS 211  
LKSIG 2879  
CSPED 18 Hz  
FILDC  
FILDF

### <sup>13</sup>C NMR of 4,6-bis(bromomethyl)-2-methoxymethoxy isophthalic acid dimethyl ester (12)

C:\Documents and Settings\ALPHA\11-11-11\UozumiG\muto\full data\Bromide(TM5062-02-13C).als

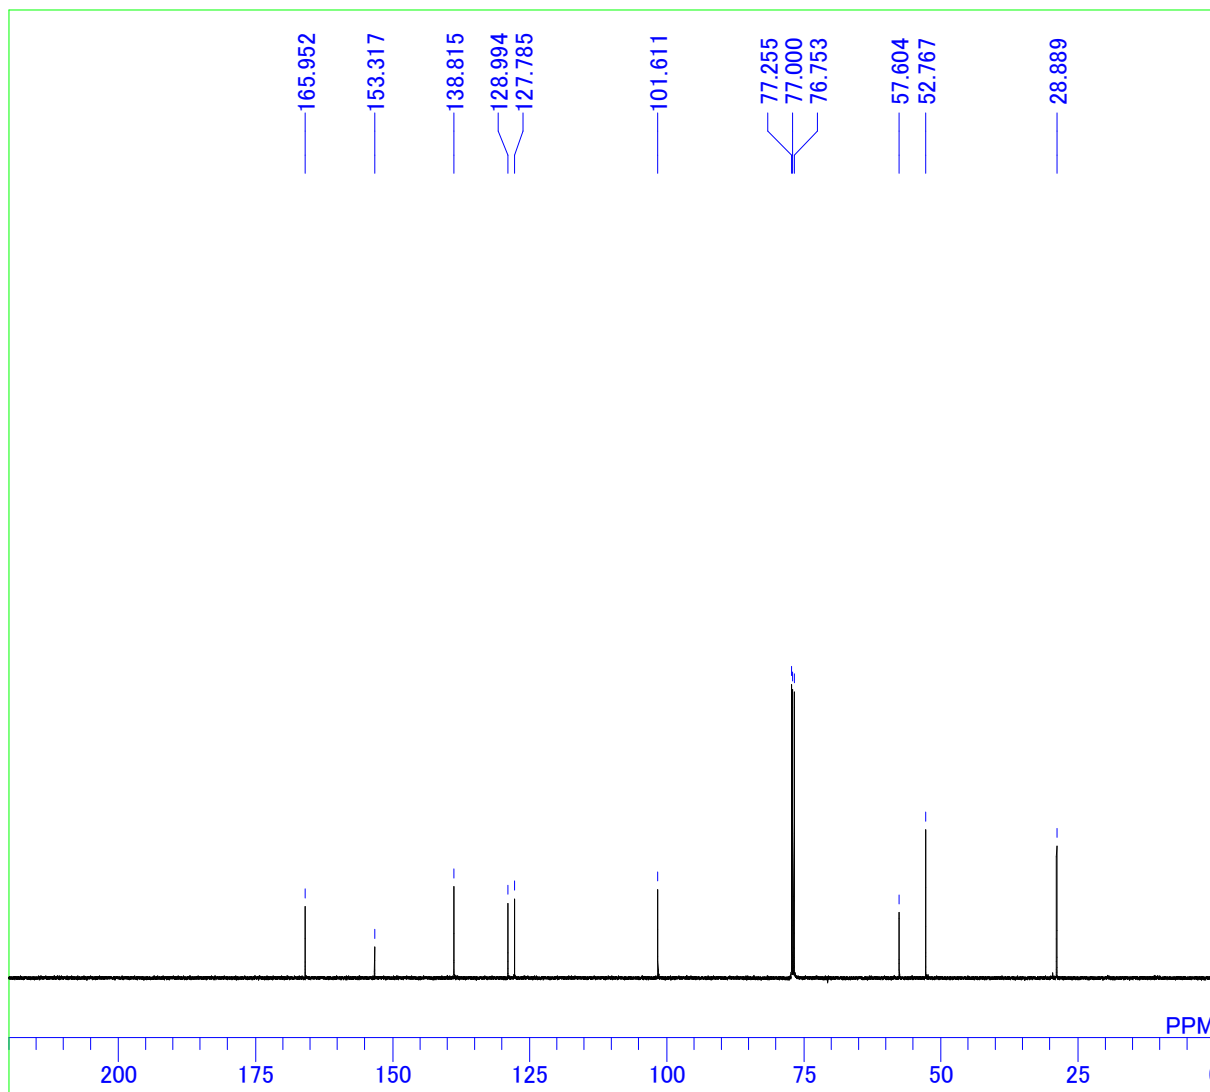

MENUF bcm\_th5atfTH5ATFG2\_2  
OBNUC 13C  
OBFRQ 125.65 MHz  
OBFIN 127958.00 Hz  
PW1 5.75 usec  
DEADT 10.00 usec  
PREDL 0.20000 msec  
INIWT 10.0000 msec  
POINT 32768  
SAMPO 32768  
TIMES 4000  
DUMMY 1  
FREQU 33898.30 Hz  
FILTR 16950 Hz  
DELAY 11.80 usec  
ACQTM 0.9667 sec  
PD 1.0000 sec  
ADBIT 16  
RGAIN 27  
BF 1.00 Hz  
T1 0.00  
T2 0.00  
T3 90.00  
T4 100.00  
EXMOD SINGL  
EXPCM Single pulse  
IRNUC 1H  
IRFRQ 500.00 MHz  
IRFIN 162410.00 Hz  
IRRPW 50 usec  
IRATN 511  
DFILE C:\Documents and Settings\ALPHA\11-11-11\UozumiG\muto\full data\Bromide(TM5062-02-13C).als  
SHMFL TH5ATFG2\_2  
LKFIN 70334.0 Hz  
LKLEV 180  
LGAIN 21  
LKPHS 211  
LKSIG 686  
CSPED 17 Hz  
FILDC  
FILDF

### <sup>1</sup>H NMR of 2-methoxymethoxy-4,6-bis(2,5,8,11-tetraoxadodecyl)isophthalic acid dimethyl ester (13)

C:\Documents and Settings\ALPHA\1-1-1-1\UozumiG\muto\full data\MOM2(TM6008-04-1H).als

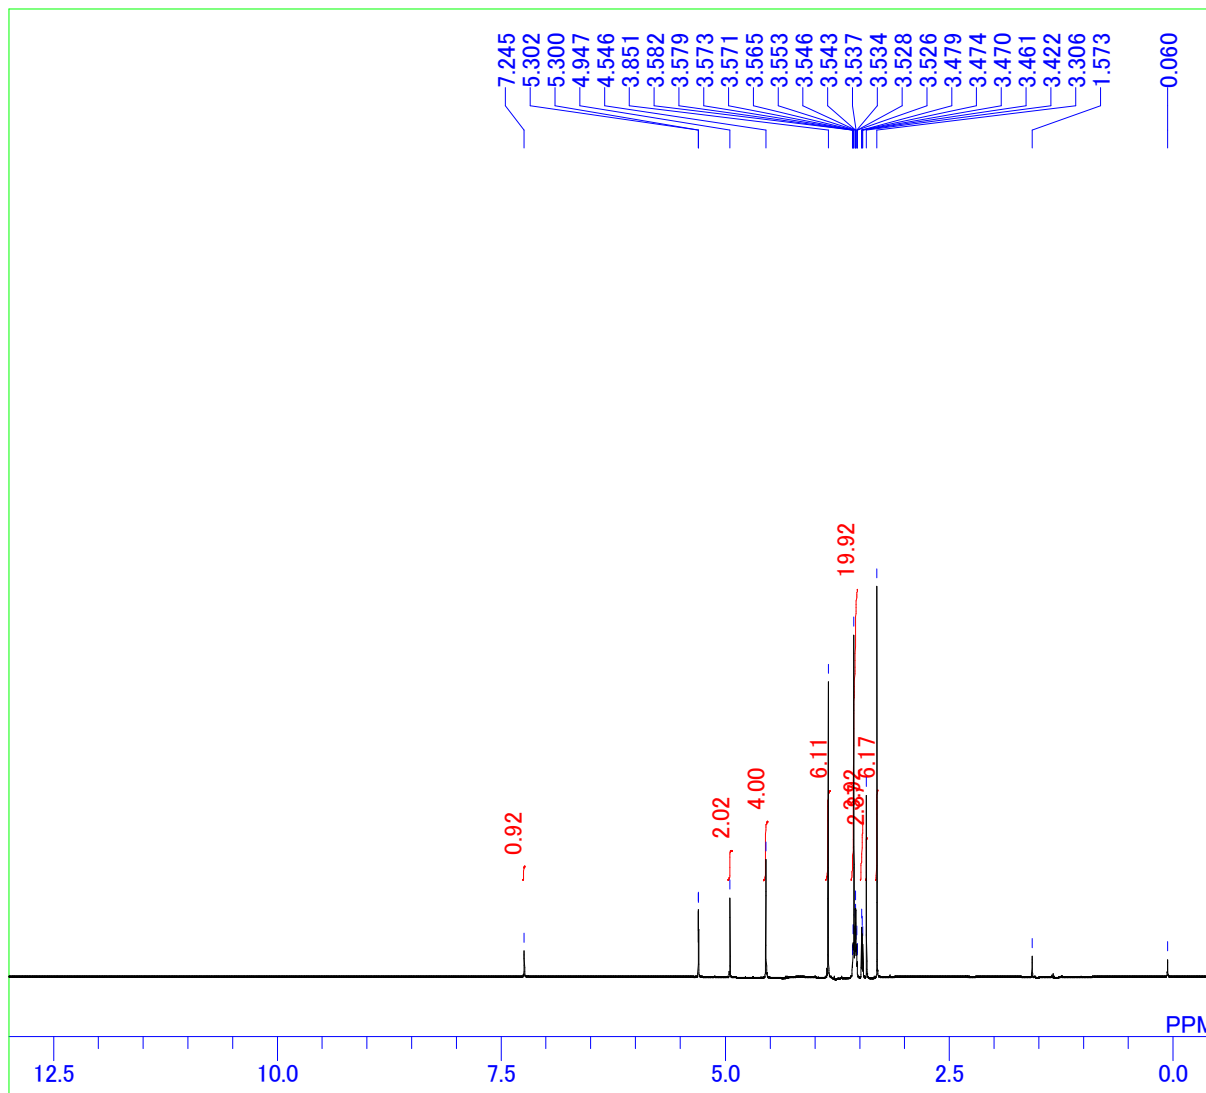

|       |                                   |
|-------|-----------------------------------|
| MENUF | non_th5atfTH5ATFG2                |
| OBNUC | 1H                                |
| OBFRQ | 500.00 MHz                        |
| OBFIN | 162410.00 Hz                      |
| PW1   | 6.40 usec                         |
| DEADT | 56.80 usec                        |
| PREDL | 0.20000 msec                      |
| INIWT | 10.0000 msec                      |
| POINT | 16384                             |
| SAMPO | 16384                             |
| TIMES | 32                                |
| DUMMY | 1                                 |
| FREQU | 10000.00 Hz                       |
| FILTR | 5000 Hz                           |
| DELAY | 40.00 usec                        |
| ACQTM | 10.0000 sec                       |
| PD    | 12.0000 sec                       |
| ADBIT | 16                                |
| RGAIN | 17                                |
| BF    | 0.23 Hz                           |
| T1    | 0.00                              |
| T2    | 0.00                              |
| T3    | 90.00                             |
| T4    | 100.00                            |
| EXMOD | SINGL                             |
| EXPCM | Single pulse                      |
| IRNUC | 1H                                |
| IRFRQ | 500.00 MHz                        |
| IRFIN | 162410.00 Hz                      |
| IRRPW | 50 usec                           |
| IRATN | 511                               |
| DFILE | C:\Documents and Settings\ALPHA\1 |
| SHMFL | TH5ATFG2                          |
| LKFIN | 70186.0 Hz                        |
| LKLEV | 160                               |
| LGAIN | 18                                |
| LKPHS | 212                               |
| LKSIG | 884                               |
| CSPED | 16 Hz                             |
| FILDC |                                   |
| FILDF |                                   |

### <sup>13</sup>C NMR of 2-methoxymethoxy-4,6-bis(2,5,8,11-tetraoxadodecyl)isophthalic acid dimethyl ester (13)

C:\Documents and Settings\ALPHA\11-11-11\UozumiG\muto\full data\MOM2(TM5083-04-13c).als

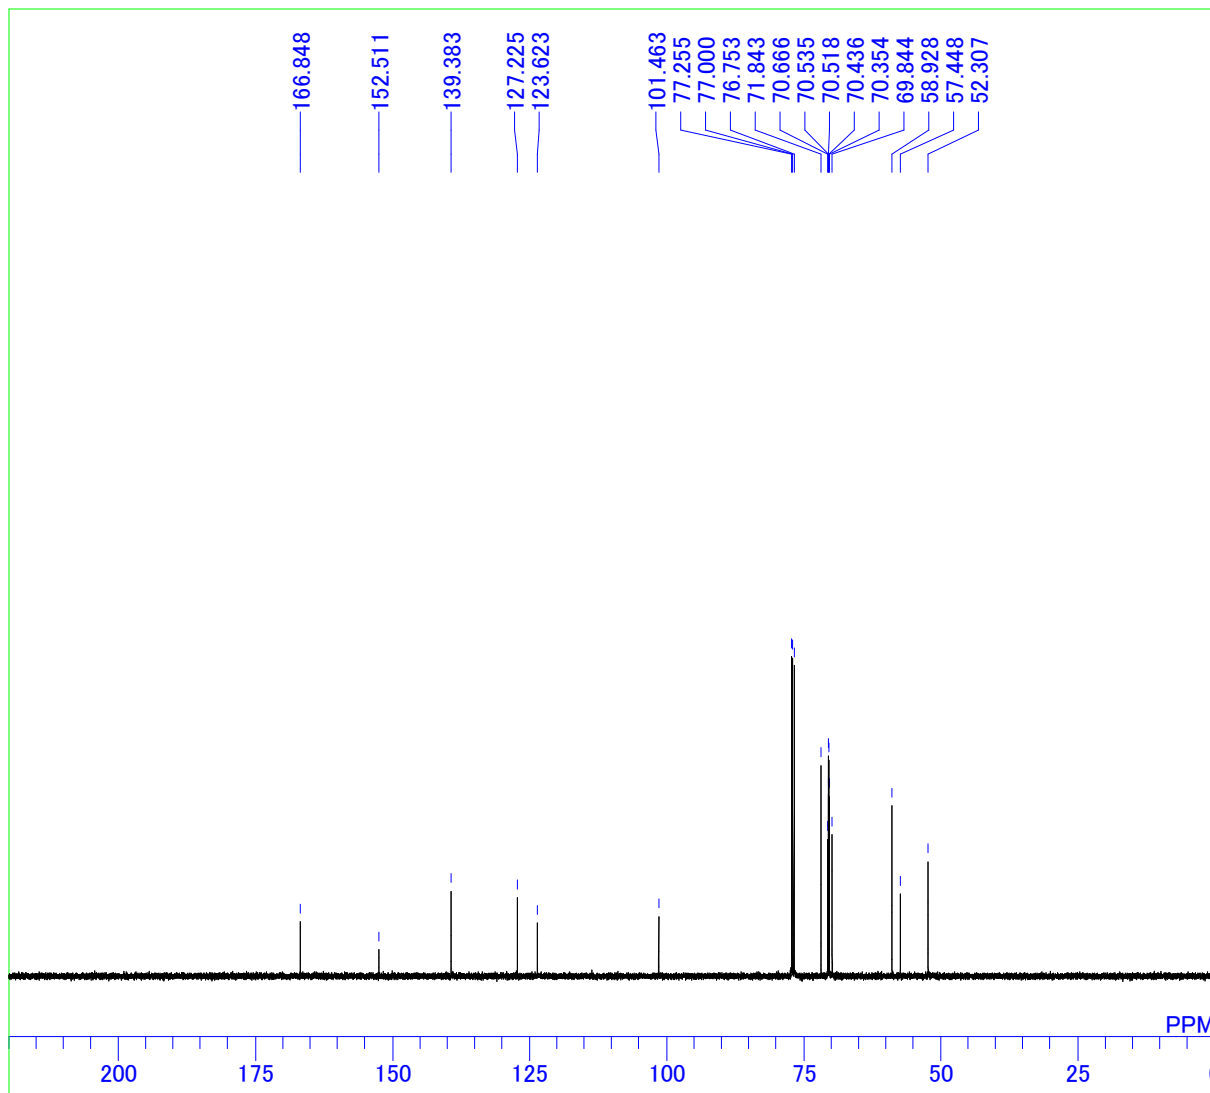

MENUF bcm\_th5atfTH5ATFG2  
OBNUC 13C  
OBFRQ 125.65 MHz  
OBFIN 127958.00 Hz  
PW1 5.75 usec  
DEADT 10.00 usec  
PREDL 0.20000 msec  
INIWT 10.0000 msec  
POINT 32768  
SAMPO 32768  
TIMES 1000  
DUMMY 1  
FREQU 33898.30 Hz  
FILTR 16950 Hz  
DELAY 11.80 usec  
ACQTM 0.9667 sec  
PD 1.0000 sec  
ADBIT 16  
RGAIN 27  
BF 0.50 Hz  
T1 0.00  
T2 0.00  
T3 90.00  
T4 100.00  
EXMOD SINGL  
EXPCM Single pulse  
IRNUC 1H  
IRFRQ 500.00 MHz  
IRFIN 162410.00 Hz  
IRRPW 50 usec  
IRATN 511  
DFILE C:\Documents and Settings\ALPHA\11-11-11\UozumiG\muto\full data\MOM2(TM5083-04-13c).als  
SHMFL TH5ATFG2  
LKFIN 70334.0 Hz  
LKLEV 180  
LGAIN 23  
LKPHS 214  
LKSIG 843  
CSPED 16 Hz  
FILDC  
FILDF

### <sup>1</sup>H NMR of 2,6-dihydroxymethyl-3,5-bis(2,5,8,11-tetraoxadodecyl)phenyl methoxymethyl ether (14)

C:\Documents and Settings\ALPHA\11-11-11\UozumiG\muto\full data\Alcohol(TM5084-04-1H).als

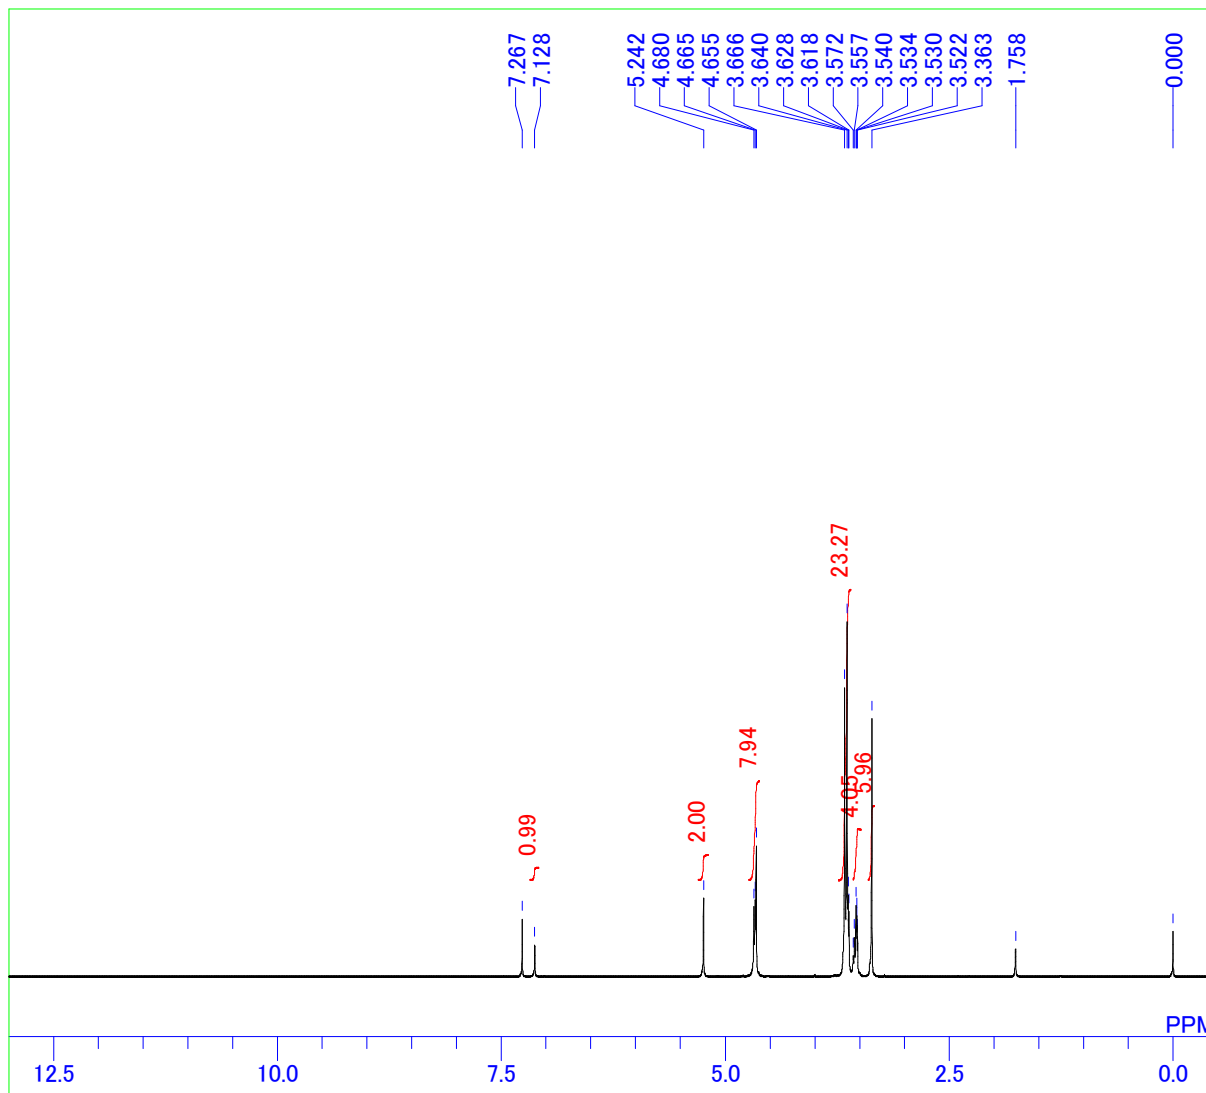

|       |                                                                                           |
|-------|-------------------------------------------------------------------------------------------|
| MENUF | non_th5atfTH5ATFG2_2                                                                      |
| OBNUC | 1H                                                                                        |
| OBFRQ | 500.00 MHz                                                                                |
| OBFIN | 162410.00 Hz                                                                              |
| PW1   | 6.40 usec                                                                                 |
| DEADT | 56.80 usec                                                                                |
| PREDL | 0.20000 msec                                                                              |
| INIWT | 10.0000 msec                                                                              |
| POINT | 16384                                                                                     |
| SAMPO | 16384                                                                                     |
| TIMES | 32                                                                                        |
| DUMMY | 1                                                                                         |
| FREQU | 10000.00 Hz                                                                               |
| FILTR | 5000 Hz                                                                                   |
| DELAY | 40.00 usec                                                                                |
| ACQTM | 10.0000 sec                                                                               |
| PD    | 12.0000 sec                                                                               |
| ADBIT | 16                                                                                        |
| RGAIN | 16                                                                                        |
| BF    | 0.50 Hz                                                                                   |
| T1    | 0.00                                                                                      |
| T2    | 0.00                                                                                      |
| T3    | 90.00                                                                                     |
| T4    | 100.00                                                                                    |
| EXMOD | SINGL                                                                                     |
| EXPCM | Single pulse                                                                              |
| IRNUC | 1H                                                                                        |
| IRFRQ | 500.00 MHz                                                                                |
| IRFIN | 162410.00 Hz                                                                              |
| IRRPW | 50 usec                                                                                   |
| IRATN | 511                                                                                       |
| DFILE | C:\Documents and Settings\ALPHA\11-11-11\UozumiG\muto\full data\Alcohol(TM5084-04-1H).als |
| SHMFL | TH5ATFG2_2                                                                                |
| LKFIN | 70334.0 Hz                                                                                |
| LKLEV | 180                                                                                       |
| LGAIN | 22                                                                                        |
| LKPHS | 211                                                                                       |
| LKSIG | 624                                                                                       |
| CSPED | 14 Hz                                                                                     |
| FILDC |                                                                                           |
| FILDF |                                                                                           |



### <sup>13</sup>C NMR of 2,6-dihydroxymethyl-3,5-bis(2,5,8,11-tetraoxadodecyl)phenyl methoxymethyl ether (14)

C:\Documents and Settings\ALPHA\11-10-10\UozumiG\muto\TMEXP0500-0599\TM5084-04-13c-02f.als

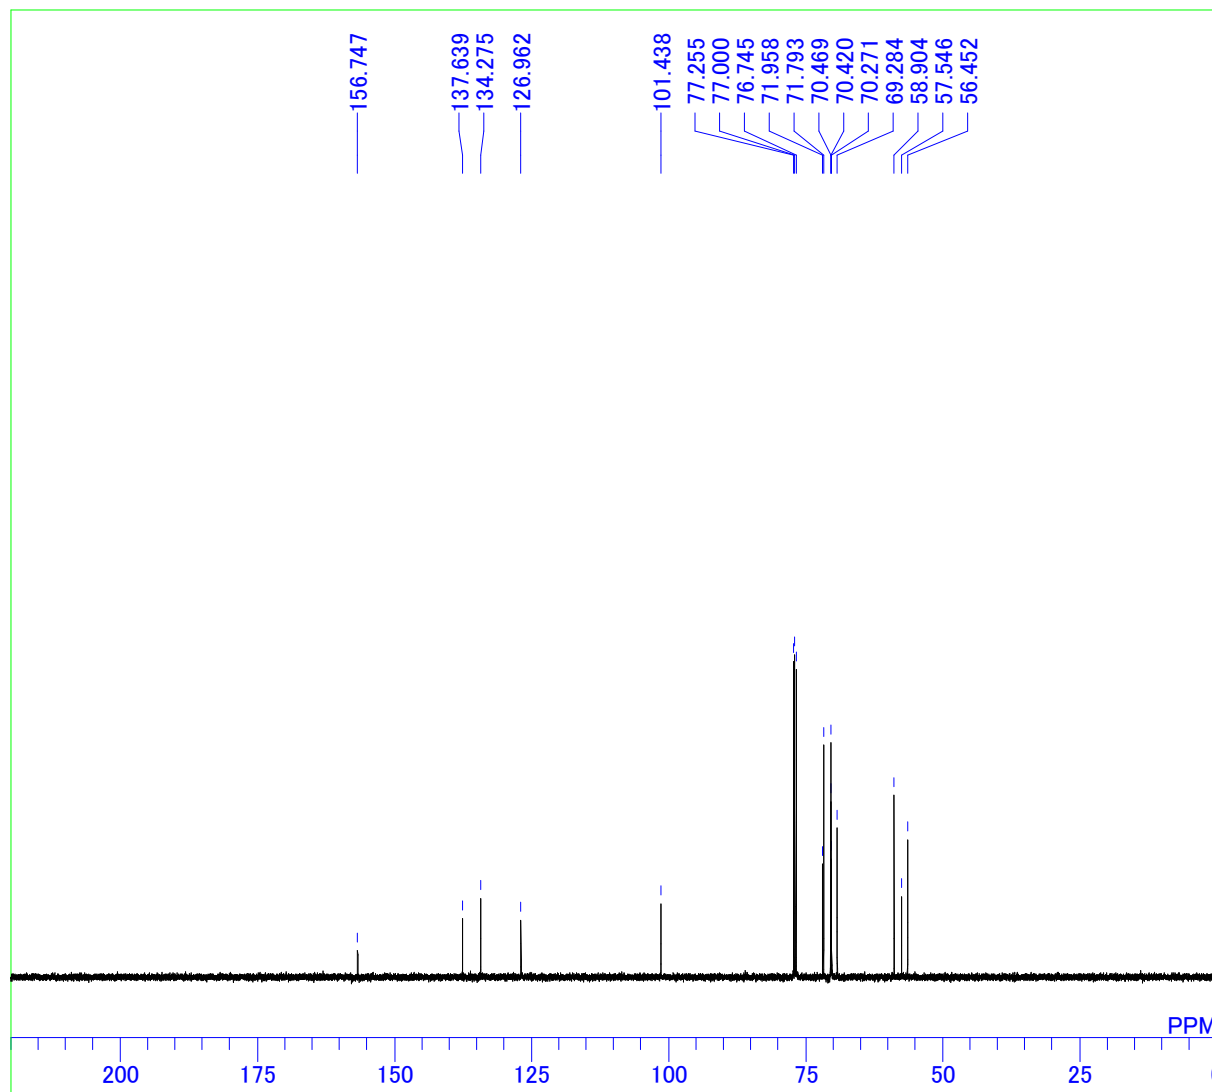

MENUF bcm\_th5atfTH5ATFG2\_2  
OBNUC 13C  
OBFRQ 125.65 MHz  
OBFIN 127958.00 Hz  
PW1 5.75 usec  
DEADT 10.00 usec  
PREDL 0.20000 msec  
INIWT 10.0000 msec  
POINT 32768  
SAMPO 32768  
TIMES 4000  
DUMMY 1  
FREQU 33898.30 Hz  
FILTR 16950 Hz  
DELAY 11.80 usec  
ACQTM 0.9667 sec  
PD 1.0000 sec  
ADBIT 16  
RGAIN 25  
BF 0.50 Hz  
T1 0.00  
T2 0.00  
T3 90.00  
T4 100.00  
EXMOD SINGL  
EXPCM Single pulse  
IRNUC 1H  
IRFRQ 500.00 MHz  
IRFIN 162410.00 Hz  
IRRPW 50 usec  
IRATN 511  
DFILE C:\Documents and Settings\ALPHA\11-10-10\UozumiG\muto\TMEXP0500-0599\TM5084-04-13c-02f.als  
SHMFL TH5ATFG2\_2  
LKFIN 70334.0 Hz  
LKLEV 180  
LGAIN 23  
LKPHS 211  
LKSIG 1127  
CSPED 16 Hz  
FILDC  
FILDF

### <sup>1</sup>H NMR of 2,6-diformyl-3,5-bis(2,5,8,11-tetraoxadodecyl)phenyl methoxymethyl ether (15)

C:\Documents and Settings\ALPHA\11-11-11\UozumiG\muto\full data\Aldehyde1(TM5086-06-1H).als

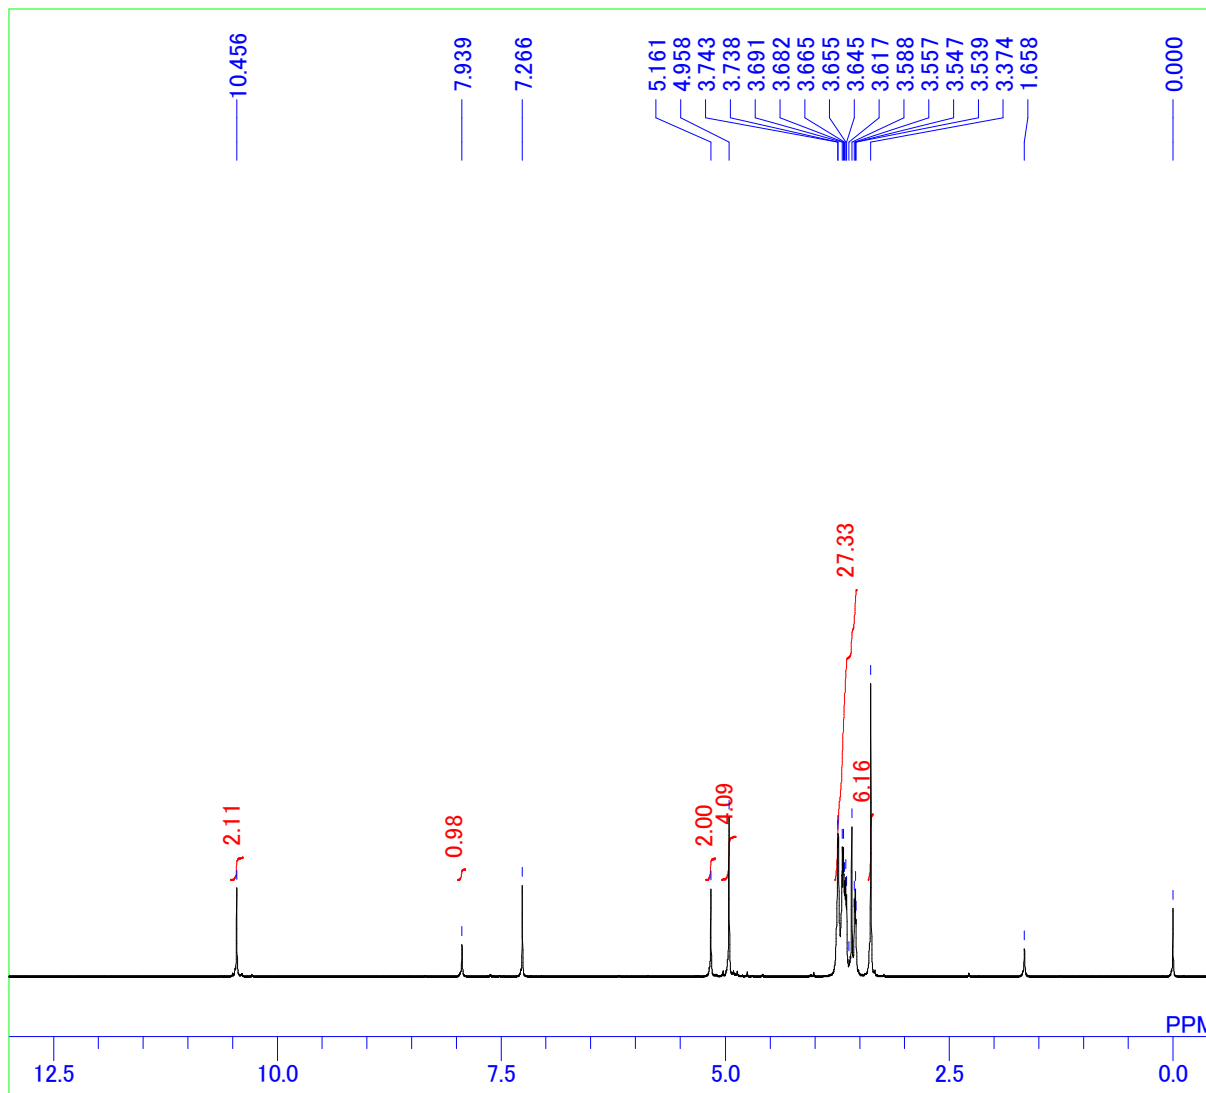

|       |                                                                                             |
|-------|---------------------------------------------------------------------------------------------|
| MENUF | non_th5atfTH5ATFG2_2                                                                        |
| OBNUC | 1H                                                                                          |
| OBFRQ | 500.00 MHz                                                                                  |
| OBFIN | 162410.00 Hz                                                                                |
| PW1   | 6.40 usec                                                                                   |
| DEADT | 56.80 usec                                                                                  |
| PREDL | 0.20000 msec                                                                                |
| INIWT | 10.0000 msec                                                                                |
| POINT | 16384                                                                                       |
| SAMPO | 16384                                                                                       |
| TIMES | 16                                                                                          |
| DUMMY | 1                                                                                           |
| FREQU | 10000.00 Hz                                                                                 |
| FILTR | 5000 Hz                                                                                     |
| DELAY | 40.00 usec                                                                                  |
| ACQTM | 10.0000 sec                                                                                 |
| PD    | 12.0000 sec                                                                                 |
| ADBIT | 16                                                                                          |
| RGAIN | 19                                                                                          |
| BF    | 1.72 Hz                                                                                     |
| T1    | 0.00                                                                                        |
| T2    | 0.00                                                                                        |
| T3    | 90.00                                                                                       |
| T4    | 100.00                                                                                      |
| EXMOD | SINGL                                                                                       |
| EXPCM | Single pulse                                                                                |
| IRNUC | 1H                                                                                          |
| IRFRQ | 500.00 MHz                                                                                  |
| IRFIN | 162410.00 Hz                                                                                |
| IRRPW | 50 usec                                                                                     |
| IRATN | 511                                                                                         |
| DFILE | C:\Documents and Settings\ALPHA\11-11-11\UozumiG\muto\full data\Aldehyde1(TM5086-06-1H).als |
| SHMFL | TH5ATFG2_2                                                                                  |
| LKFIN | 70334.0 Hz                                                                                  |
| LKLEV | 180                                                                                         |
| LGAIN | 23                                                                                          |
| LKPHS | 211                                                                                         |
| LKSIG | 1055                                                                                        |
| CSPED | 15 Hz                                                                                       |
| FILDC |                                                                                             |
| FILDF |                                                                                             |

### <sup>13</sup>C NMR of 2,6-diformyl-3,5-bis(2,5,8,11-tetraoxadodecyl)phenyl methoxymethyl ether (15)

C:\Documents and Settings\ALPHA\11-11-11\UozumiG\muto\full data\Aldehyde1(TM5086-06-13C).als

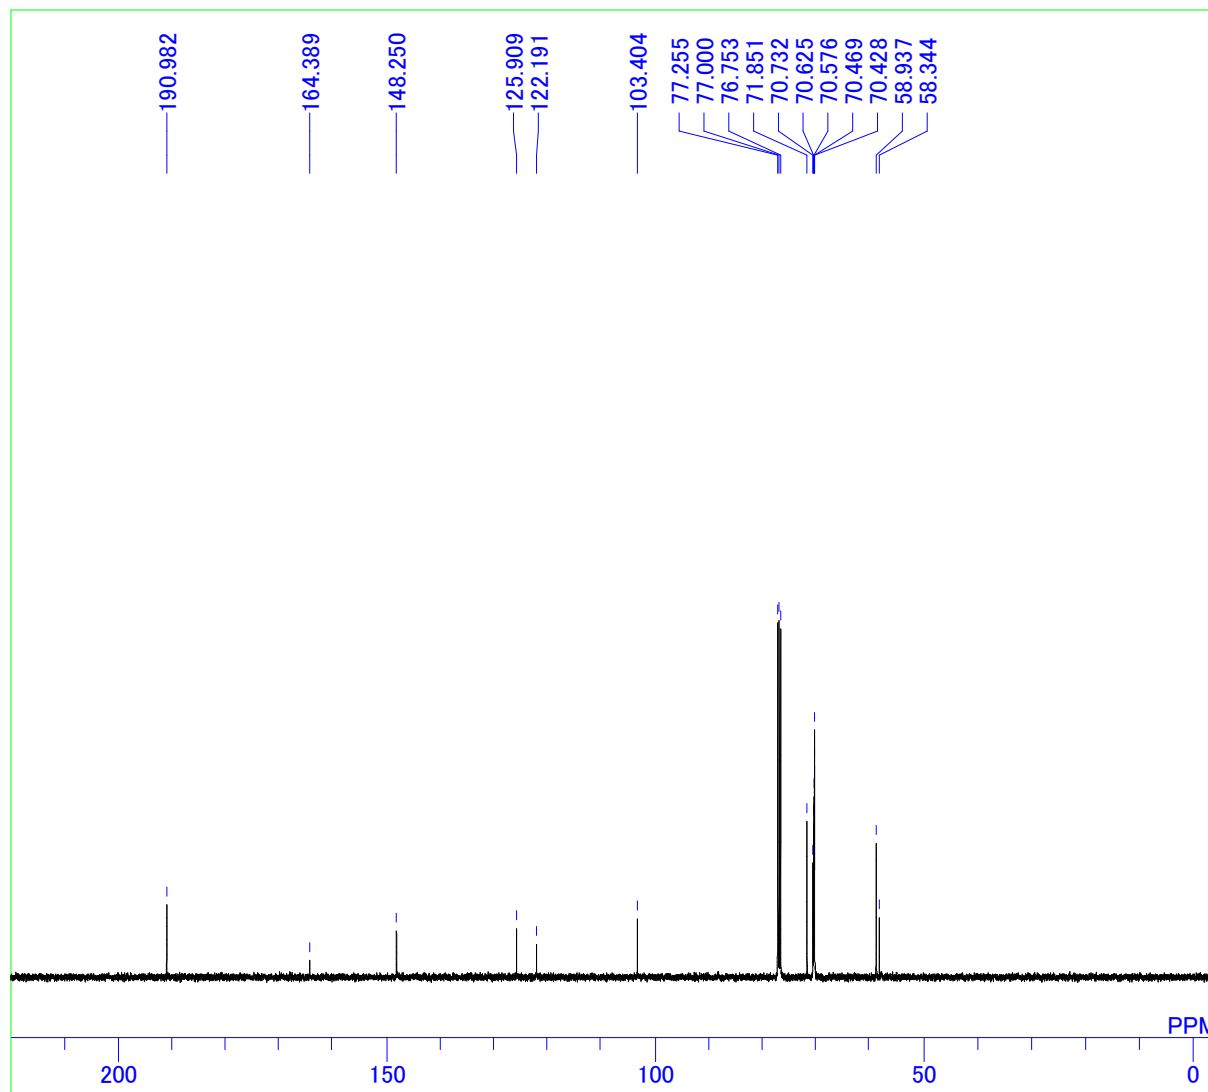

|       |                                                                                              |
|-------|----------------------------------------------------------------------------------------------|
| MENUF | bcm_th5atfTH5ATFG2_2                                                                         |
| OBNUC | 13C                                                                                          |
| OBFRQ | 125.65 MHz                                                                                   |
| OBFIN | 127958.00 Hz                                                                                 |
| PW1   | 5.75 usec                                                                                    |
| DEADT | 10.00 usec                                                                                   |
| PREDL | 0.20000 msec                                                                                 |
| INIWT | 10.0000 msec                                                                                 |
| POINT | 32768                                                                                        |
| SAMPO | 32768                                                                                        |
| TIMES | 1000                                                                                         |
| DUMMY | 1                                                                                            |
| FREQU | 33898.30 Hz                                                                                  |
| FILTR | 16950 Hz                                                                                     |
| DELAY | 11.80 usec                                                                                   |
| ACQTM | 0.9667 sec                                                                                   |
| PD    | 1.0000 sec                                                                                   |
| ADBIT | 16                                                                                           |
| RGAIN | 27                                                                                           |
| BF    | 1.72 Hz                                                                                      |
| T1    | 0.00                                                                                         |
| T2    | 0.00                                                                                         |
| T3    | 90.00                                                                                        |
| T4    | 100.00                                                                                       |
| EXMOD | SINGL                                                                                        |
| EXPCM | Single pulse                                                                                 |
| IRNUC | 1H                                                                                           |
| IRFRQ | 500.00 MHz                                                                                   |
| IRFIN | 162410.00 Hz                                                                                 |
| IRRPW | 50 usec                                                                                      |
| IRATN | 511                                                                                          |
| DFILE | C:\Documents and Settings\ALPHA\11-11-11\UozumiG\muto\full data\Aldehyde1(TM5086-06-13C).als |
| SHMFL | TH5ATFG2_2                                                                                   |
| LKFIN | 70334.0 Hz                                                                                   |
| LKLEV | 180                                                                                          |
| LGAIN | 23                                                                                           |
| LKPHS | 211                                                                                          |
| LKSIG | 920                                                                                          |
| CSPED | 16 Hz                                                                                        |
| FILDC |                                                                                              |
| FILDF |                                                                                              |

### <sup>1</sup>H NMR of 2,6-diformyl-3,5-bis(2,5,8,11-tetraoxadodecyl)phenol (16)

C:\Documents and Settings\ALPHA\1-1-1-1\UozumiG\muto\full data\Aldehyde2(TMExp0299-column03-1H).als

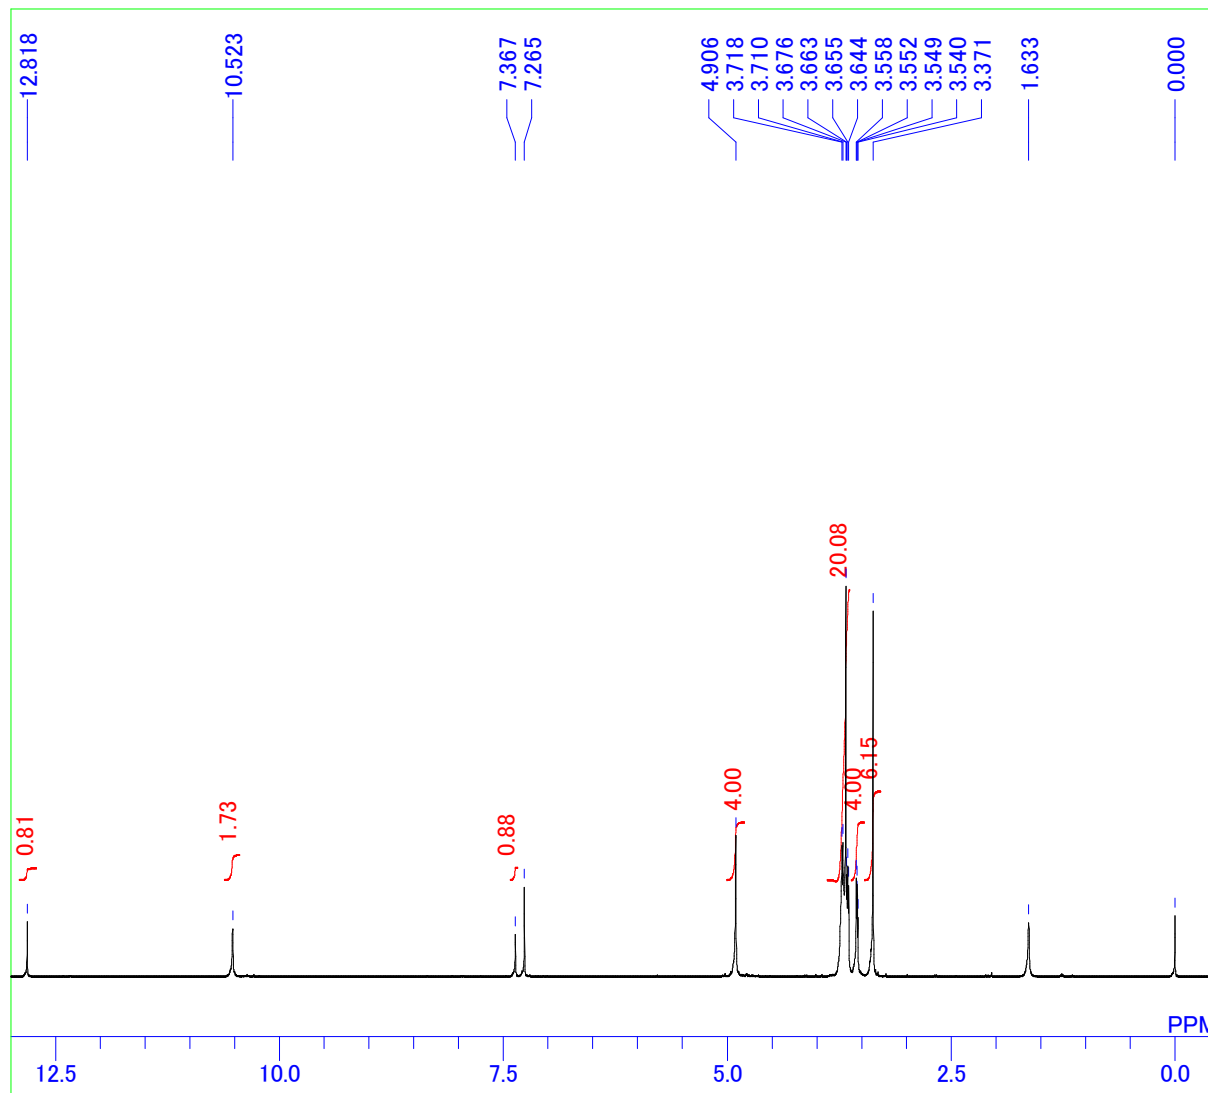

MENUF non\_th5atfTH5ATFG2\_2  
OBNUC 1H  
OBFRQ 500.00 MHz  
OBFIN 162410.00 Hz  
PW1 6.40 usec  
DEADT 56.80 usec  
PREDL 0.20000 msec  
INIWT 10.0000 msec  
POINT 16384  
SAMPO 16384  
TIMES 16  
DUMMY 1  
FREQU 10000.00 Hz  
FILTR 5000 Hz  
DELAY 40.00 usec  
ACQTM 1.6384 sec  
PD 2.0000 sec  
ADBIT 16  
RGAIN 21  
BF 0.80 Hz  
T1 0.00  
T2 0.00  
T3 90.00  
T4 100.00  
EXMOD SINGL  
EXPCM Single pulse  
IRNUC 1H  
IRFRQ 500.00 MHz  
IRFIN 162410.00 Hz  
IRRPW 50 usec  
IRATN 511  
DFILE C:\Documents and Settings\ALPHA\1  
SHMFL TH5ATFG2\_2  
LKFIN 70334.0 Hz  
LKLEV 180  
LGAIN 20  
LKPHS 214  
LKSIG 880  
CSPED 13 Hz  
FILDC  
FILDF

### <sup>13</sup>C NMR of 2,6-diformyl-3,5-bis(2,5,8,11-tetraoxadodecyl)phenol (16)

C:\Documents and Settings\ALPHA\11-11-11\UozumiG\muto\TMEXP0500-0599\TM5087-05-13c.als

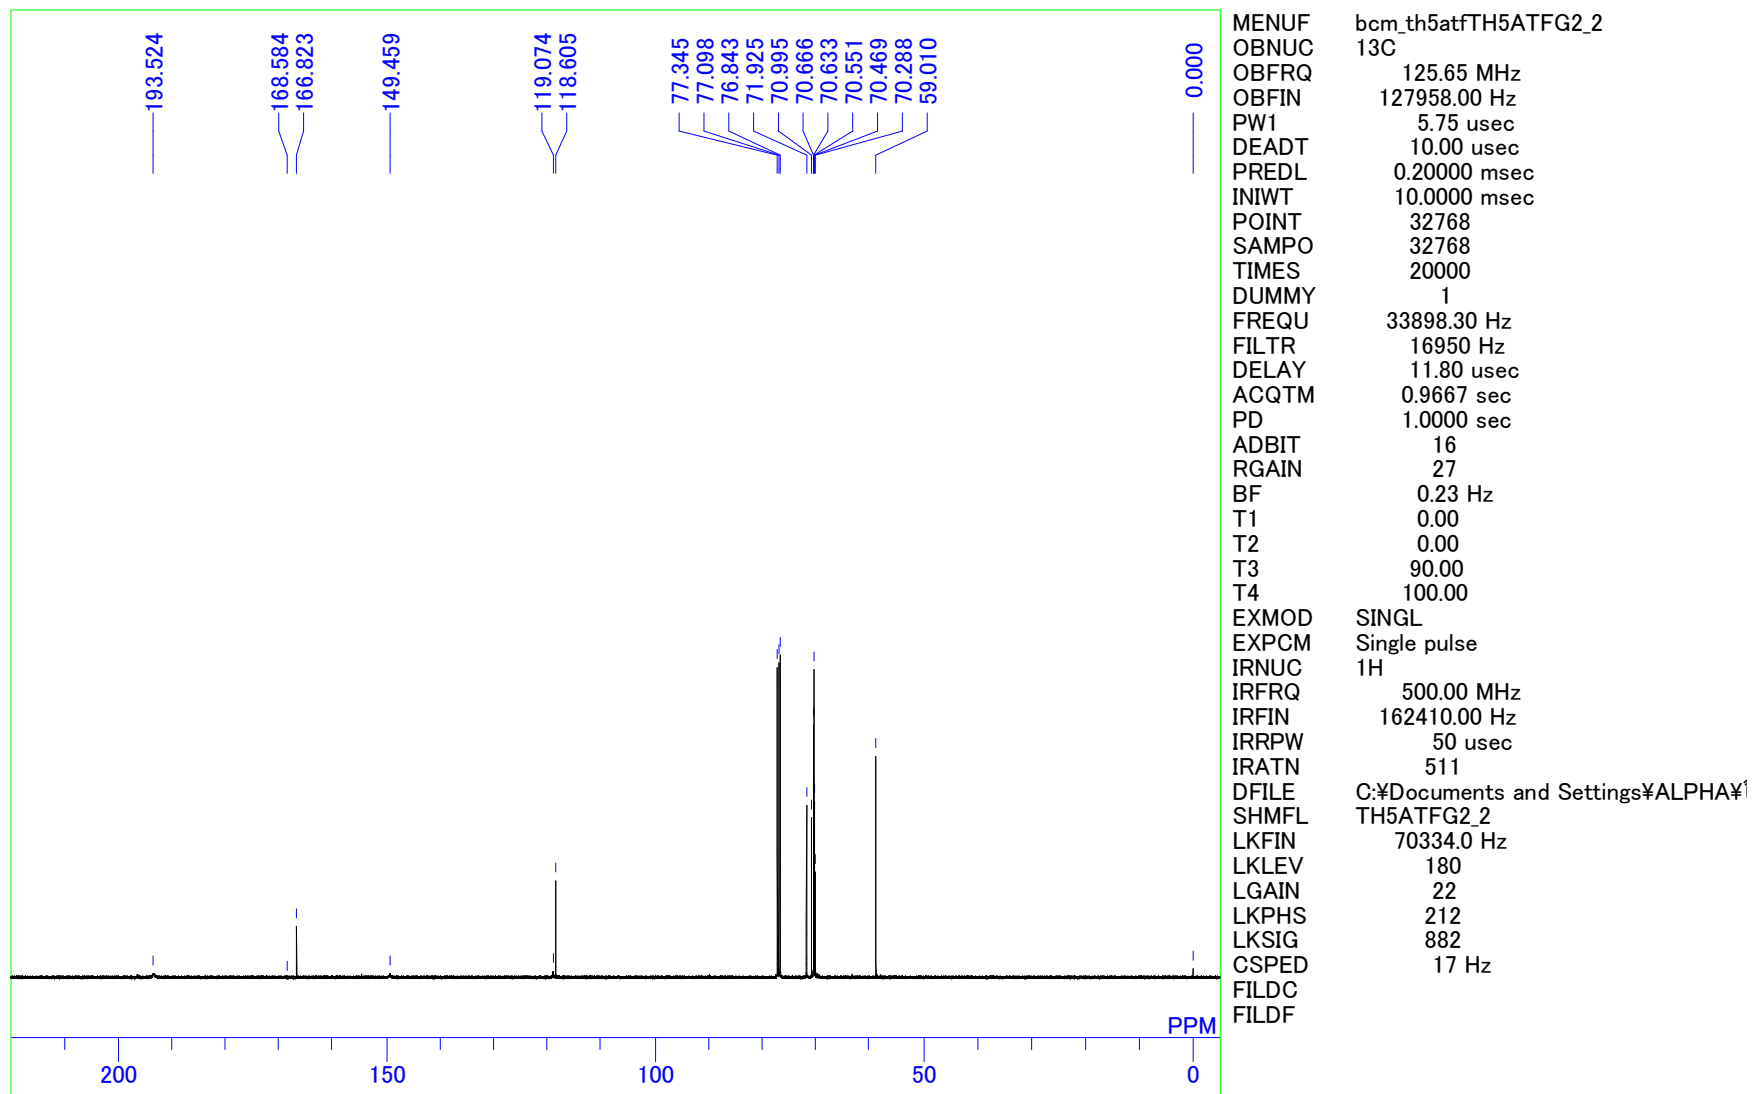

### <sup>1</sup>H NMR of 2,6-diformyl-3,5-bis(2,5,8,11-tetraoxadodecyl)phenyl trifluoromethanesulfonate (17)

C:\Documents and Settings\ALPHA\11-11-11\UozumiG\muto\full data\Triflate(TMExp0491-02-1H).als

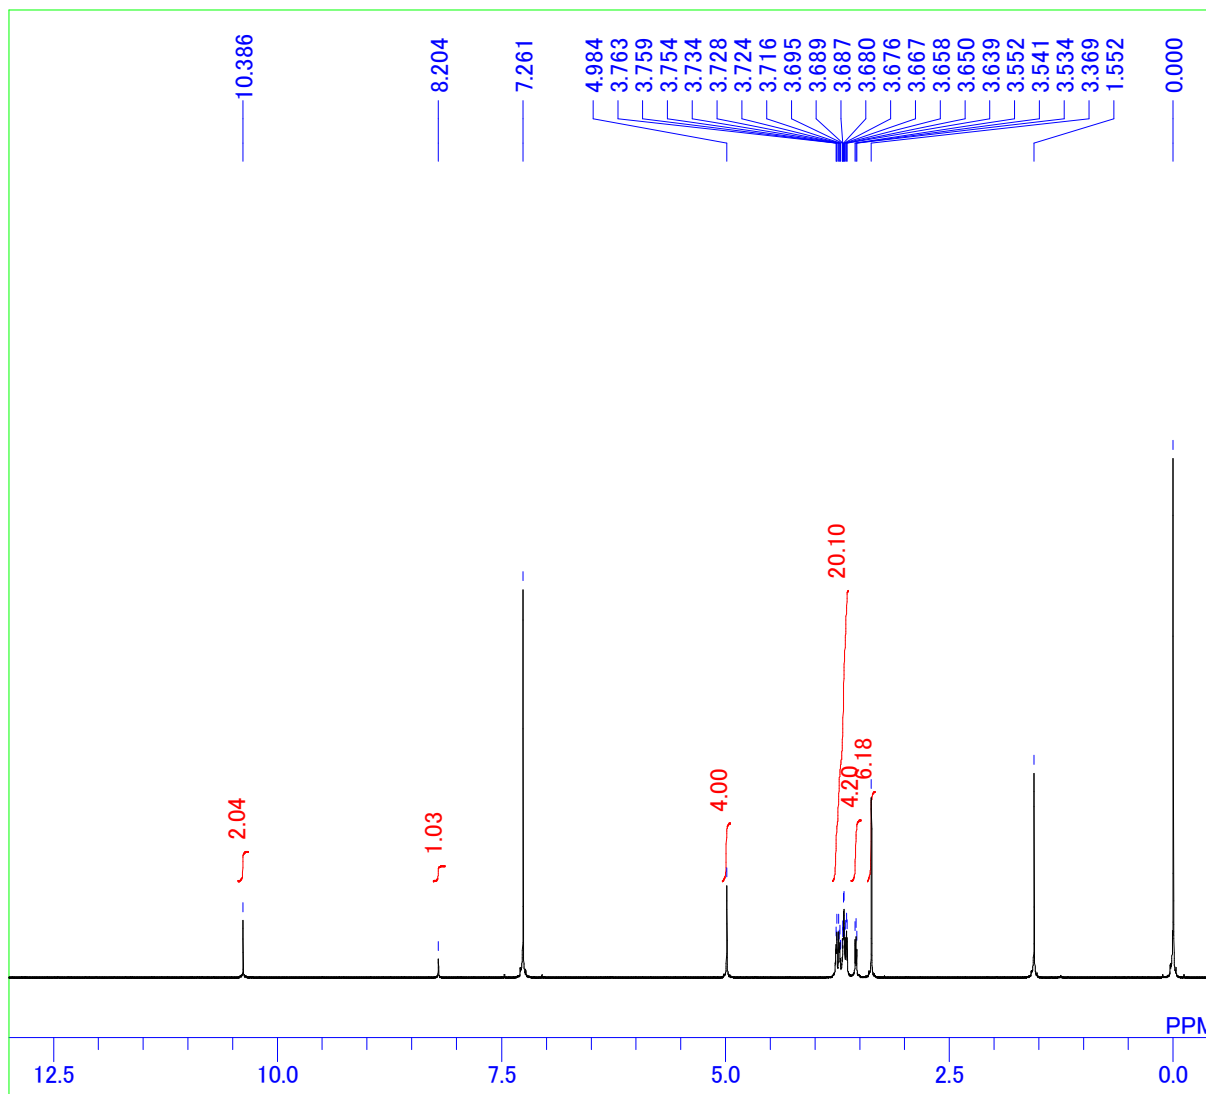

MENUF non\_th5atfTH5ATFG2  
OBNUC 1H  
OBFRQ 500.00 MHz  
OBFIN 162410.00 Hz  
PW1 6.40 usec  
DEADT 56.80 usec  
PREDL 0.20000 msec  
INIWT 10.0000 msec  
POINT 16384  
SAMPO 16384  
TIMES 32  
DUMMY 1  
FREQU 10000.00 Hz  
FILTR 5000 Hz  
DELAY 40.00 usec  
ACQTM 10.0000 sec  
PD 12.0000 sec  
ADBIT 16  
RGAIN 24  
BF 0.00 Hz  
T1 0.00  
T2 0.00  
T3 90.00  
T4 100.00  
EXMOD SINGL  
EXPCM Single pulse  
IRNUC 1H  
IRFRQ 500.00 MHz  
IRFIN 162410.00 Hz  
IRRPW 50 usec  
IRATN 511  
DFILE C:\Documents and Settings\ALPHA\11-11-11\UozumiG\muto\full data\Triflate(TMExp0491-02-1H).als  
SHMFL TH5ATFG2  
LKFIN 70334.0 Hz  
LKLEV 180  
LGAIN 23  
LKPHS 214  
LKSIG 900  
CSPED 16 Hz  
FILDC  
FILDF

### <sup>13</sup>C NMR 2,6-diformyl-3,5-bis(2,5,8,11-tetraoxadodecyl)phenyl trifluoromethanesulfonate (17)

C:\Documents and Settings\ALPHA\1-1-1-1\UozumiG\muto\full data\Triflate(TM6033-03-13C).als

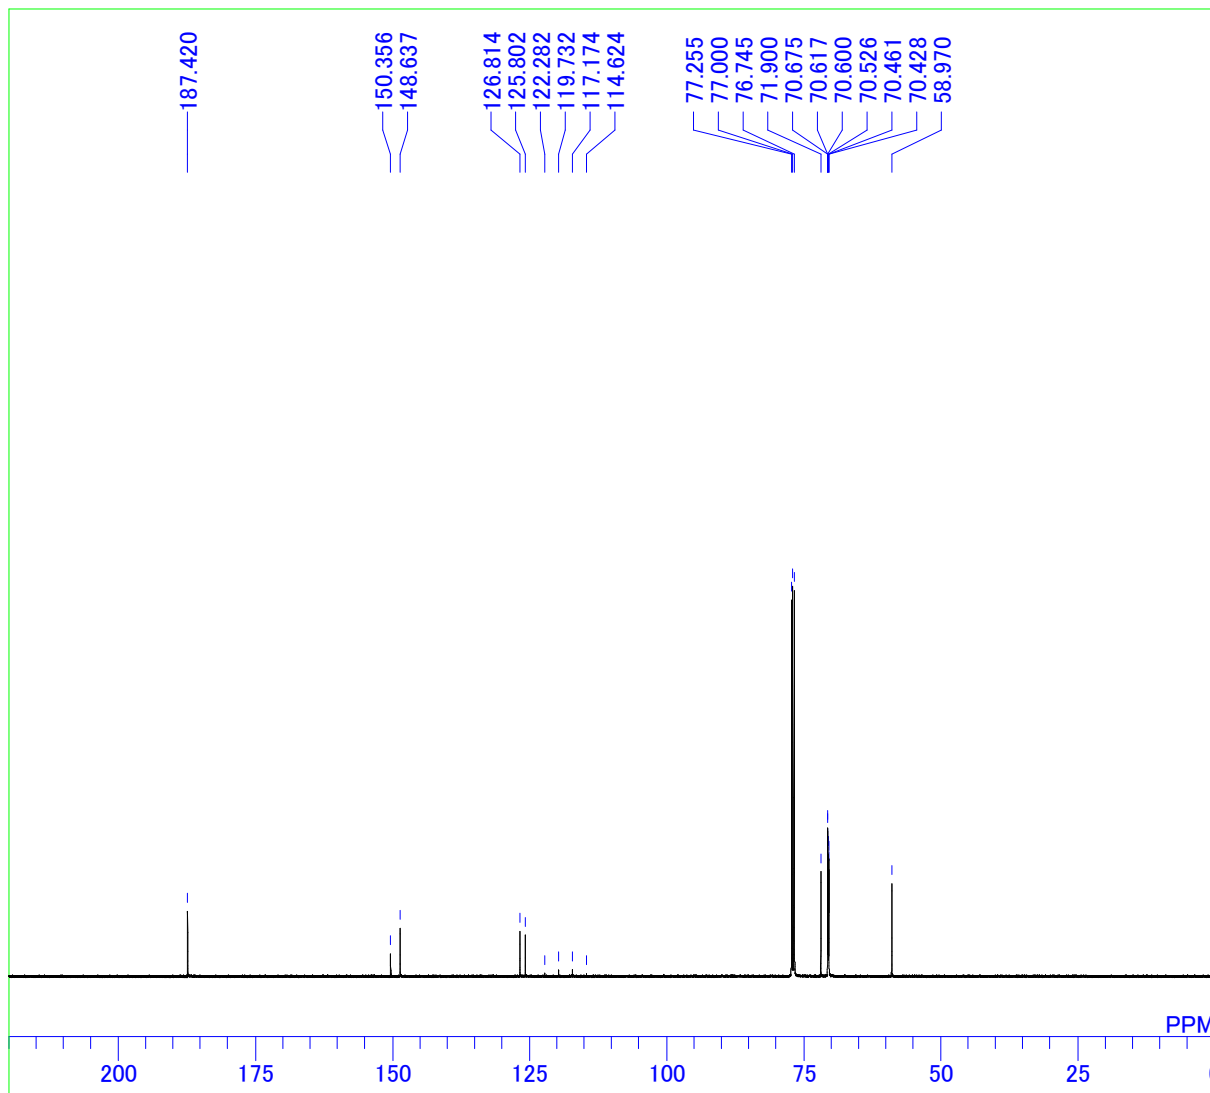

|       |                                   |
|-------|-----------------------------------|
| MENUF | bcm_th5atfTH5ATFG2_2              |
| OBNUC | 13C                               |
| OBFRQ | 125.65 MHz                        |
| OBFIN | 127958.00 Hz                      |
| PW1   | 5.75 usec                         |
| DEADT | 10.00 usec                        |
| PREDL | 0.20000 msec                      |
| INIWT | 10.0000 msec                      |
| POINT | 32768                             |
| SAMPO | 32768                             |
| TIMES | 30000                             |
| DUMMY | 1                                 |
| FREQU | 33898.30 Hz                       |
| FILTR | 16950 Hz                          |
| DELAY | 11.80 usec                        |
| ACQTM | 0.9667 sec                        |
| PD    | 1.0000 sec                        |
| ADBIT | 16                                |
| RGAIN | 27                                |
| BF    | 1.00 Hz                           |
| T1    | 0.00                              |
| T2    | 0.00                              |
| T3    | 90.00                             |
| T4    | 100.00                            |
| EXMOD | SINGL                             |
| EXPCM | Single pulse                      |
| IRNUC | 1H                                |
| IRFRQ | 500.00 MHz                        |
| IRFIN | 162410.00 Hz                      |
| IRRPW | 50 usec                           |
| IRATN | 511                               |
| DFILE | C:\Documents and Settings\ALPHA\1 |
| SHMFL | TH5ATFG2_2                        |
| LKFIN | 70334.0 Hz                        |
| LKLEV | 180                               |
| LGAIN | 22                                |
| LKPHS | 212                               |
| LKSIG | 630                               |
| CSPED | 16 Hz                             |
| FILDC |                                   |
| FILDF |                                   |

# <sup>1</sup>H NMR of *trans*-[2,6-diformyl-3,5-bis(2,5,8,11-tetraoxadodecyl)phenyl]chloro bis(triphenylphosphine)palladium (6)

C:\Documents and Settings\ALPHA\1-1-1-1\UozumiG\muto\full data\Pd-complex(TM6009-06-1H).als

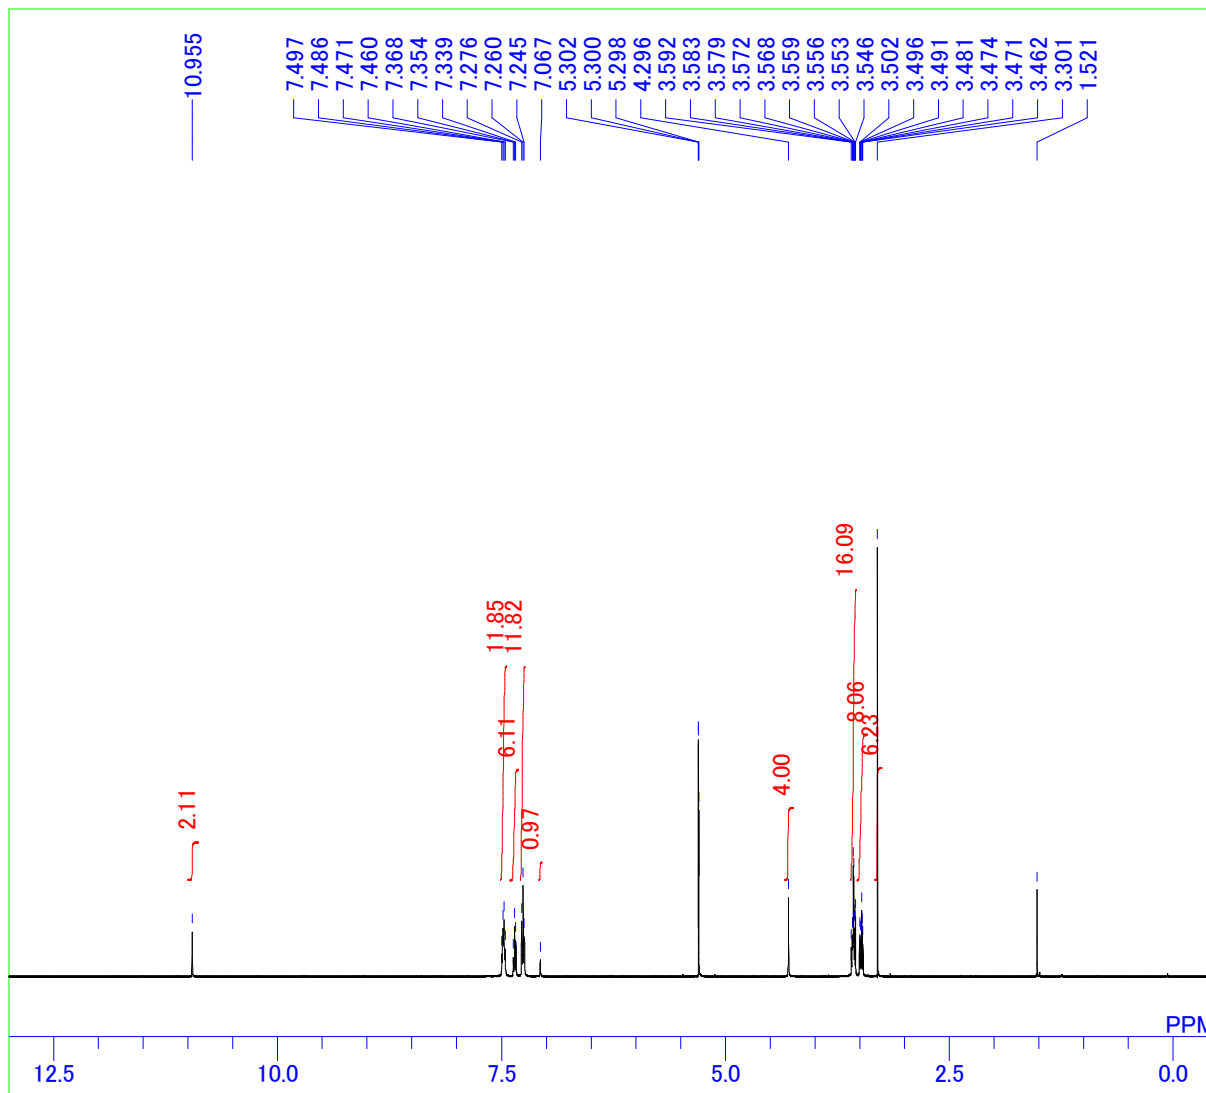

|       |                                   |
|-------|-----------------------------------|
| MENUF | non_th5atfTH5ATFG2_2              |
| OBNUC | 1H                                |
| OBFRQ | 500.00 MHz                        |
| OBFIN | 162410.00 Hz                      |
| PW1   | 6.40 usec                         |
| DEADT | 56.80 usec                        |
| PREDL | 0.20000 msec                      |
| INIWT | 10.0000 msec                      |
| POINT | 16384                             |
| SAMPO | 16384                             |
| TIMES | 16                                |
| DUMMY | 1                                 |
| FREQU | 10000.00 Hz                       |
| FILTR | 5000 Hz                           |
| DELAY | 40.00 usec                        |
| ACQTM | 5.0000 sec                        |
| PD    | 6.0000 sec                        |
| ADBIT | 16                                |
| RGAIN | 18                                |
| BF    | 0.03 Hz                           |
| T1    | 0.00                              |
| T2    | 0.00                              |
| T3    | 90.00                             |
| T4    | 100.00                            |
| EXMOD | SINGL                             |
| EXPCM | Single pulse                      |
| IRNUC | 1H                                |
| IRFRQ | 500.00 MHz                        |
| IRFIN | 162410.00 Hz                      |
| IRRPW | 50 usec                           |
| IRATN | 511                               |
| DFILE | C:\Documents and Settings\ALPHA\1 |
| SHMFL | TH5ATFG2_2                        |
| LKFIN | 70186.0 Hz                        |
| LKLEV | 160                               |
| LGAIN | 18                                |
| LKPHS | 212                               |
| LKSIG | 907                               |
| CSPED | 17 Hz                             |
| FILDC |                                   |
| FILDF |                                   |



### <sup>13</sup>C NMR of *trans*-[2,6-diformyl-3,5-bis(2,5,8,11-tetraoxadodecyl)phenyl]chloro bis(triphenylphosphine)palladium (6)

C:\Documents and Settings\ALPHA\11-11-11\UozumiG\muto\full data\Pd-complex(TM6009-13cf-5).als

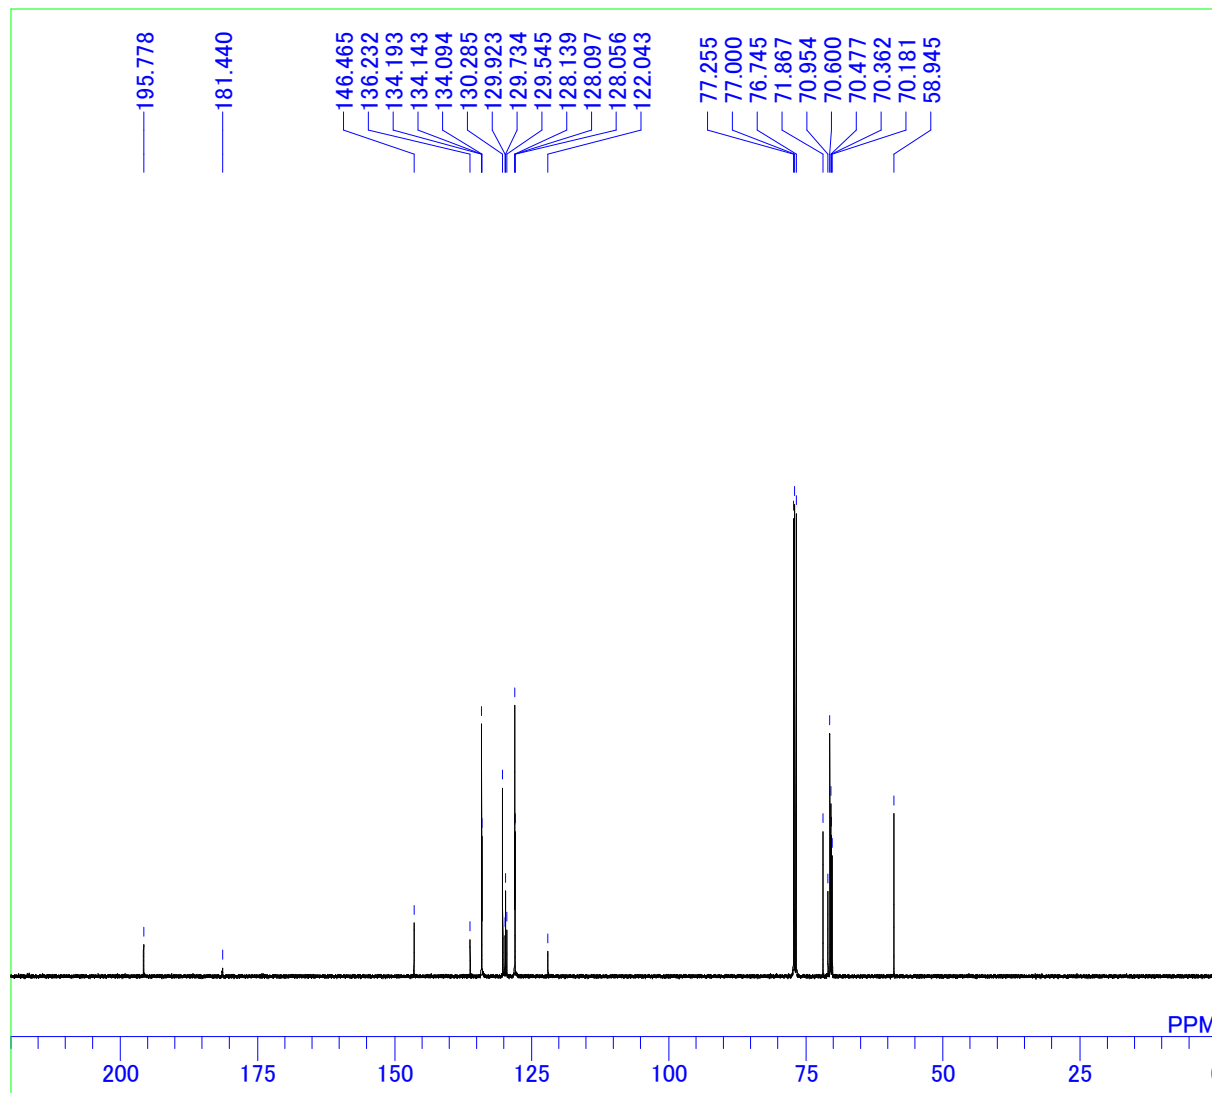

MENUF bcm\_th5atfTH5ATFG2\_2  
OBNUC 13C  
OBFRQ 125.65 MHz  
OBFIN 127958.00 Hz  
PW1 5.75 usec  
DEADT 10.00 usec  
PREDL 0.20000 msec  
INIWT 10.0000 msec  
POINT 32768  
SAMPO 32768  
TIMES 30000  
DUMMY 1  
FREQU 33898.30 Hz  
FILTR 16950 Hz  
DELAY 11.80 usec  
ACQTM 0.9667 sec  
PD 1.0000 sec  
ADBIT 16  
RGAIN 27  
BF 1.00 Hz  
T1 0.00  
T2 0.00  
T3 90.00  
T4 100.00  
EXMOD SINGL  
EXPCM Single pulse  
IRNUC 1H  
IRFRQ 500.00 MHz  
IRFIN 162410.00 Hz  
IRRPW 50 usec  
IRATN 511  
DFILE C:\Documents and Settings\ALPHA\11-11-11\UozumiG\muto\full data\Pd-complex(TM6009-13cf-5).als  
SHMFL TH5ATFG2\_2  
LKFIN 70334.0 Hz  
LKLEV 180  
LGAIN 21  
LKPHS 212  
LKSIG 664  
CSPED 16 Hz  
FILDC  
FILDF

### <sup>1</sup>H NMR of 3,5-dibromo-(tetrahydro-2H-pyran-2-yloxy)benzene (19)

C:\Documents and Settings\ALPHA\1-1-1-1\UozumiG\Hamasaka\OTHPBr2-1H.als  
OTHP-Br2

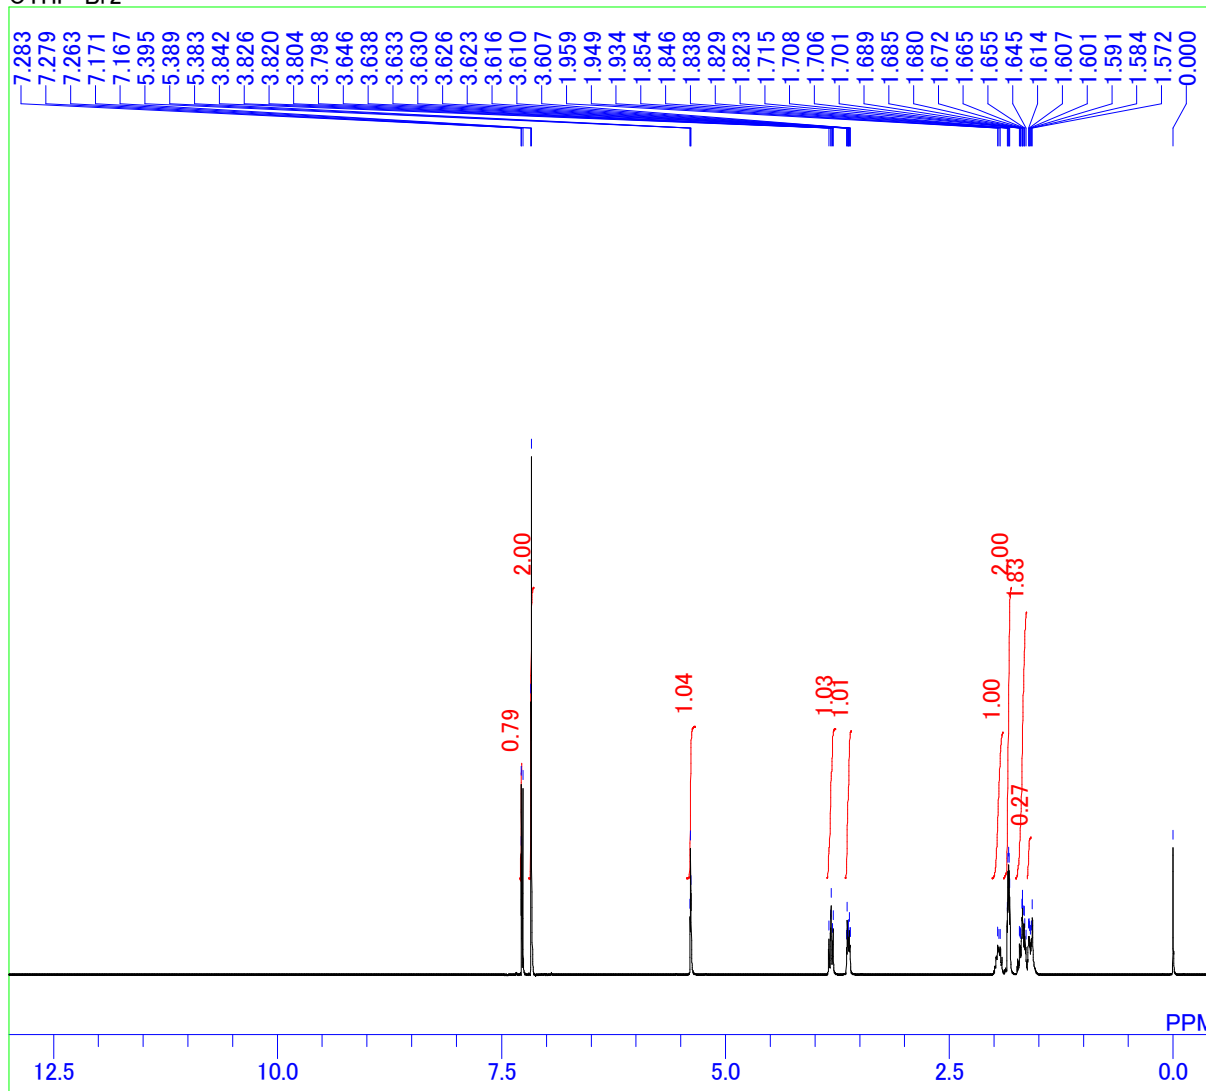

MENUF non\_th5atfTH5ATFG2\_0OTHP-Br2  
OBNUC 1H  
OBFRQ 500.00 MHz  
OBFIN 162410.00 Hz  
PW1 6.40 usec  
DEADT 56.80 usec  
PREDL 0.20000 msec  
INIWT 10.0000 msec  
POINT 16384  
SAMPO 16384  
TIMES 32  
DUMMY 1  
FREQU 10000.00 Hz  
FILTR 5000 Hz  
DELAY 40.00 usec  
ACQTM 10.0000 sec  
PD 12.0000 sec  
ADBIT 16  
RGAIN 18  
BF 0.00 Hz  
T1 0.00  
T2 0.00  
T3 90.00  
T4 100.00  
EXMOD SINGL  
EXPCM Single pulse  
IRNUC 1H  
IRFRQ 500.00 MHz  
IRFIN 162410.00 Hz  
IRRPW 50 usec  
IRATN 511  
DFILE C:\Documents and Settings\ALPHA\1  
SHMFL TH5ATFG2\_0OTHP-Br2  
LKFIN 70334.0 Hz  
LKLEV 180  
LGAIN 23  
LKPHS 201  
LKSIG 1022  
CSPED 13 Hz  
FILDC  
FILDF

### <sup>13</sup>C NMR of 3,5-dibromo-(tetrahydro-2H-pyran-2-yloxy)benzene (19)

C:\Documents and Settings\ALPHA\11-11-11\UozumiG\Hamasaka\OTHPBr2-13C.als  
OTP\_Ph.Br2

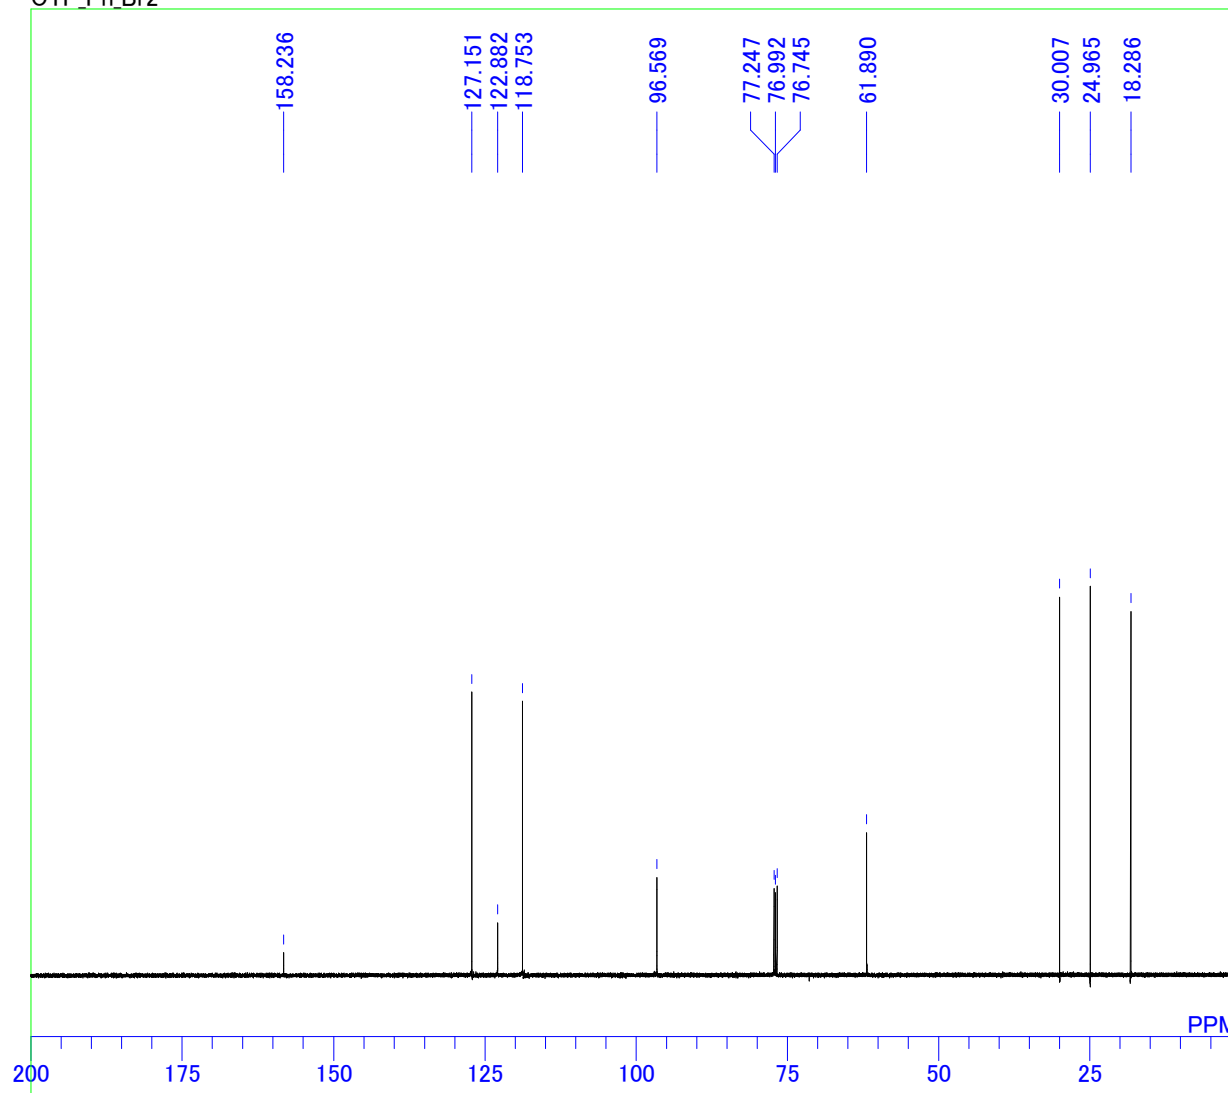

MENUF bcm\_th5atfTH5ATFG2\_0OTP\_Ph.Br2  
OBNUC 13C  
OBFRQ 125.65 MHz  
OBFIN 127958.00 Hz  
PW1 5.75 usec  
DEADT 10.00 usec  
PREDL 0.20000 msec  
INIWT 10.0000 msec  
POINT 32768  
SAMPO 32768  
TIMES 2048  
DUMMY 1  
FREQU 33898.30 Hz  
FILTR 16950 Hz  
DELAY 11.80 usec  
ACQTM 0.9667 sec  
PD 1.0000 sec  
ADBIT 16  
RGAIN 27  
BF 0.00 Hz  
T1 0.00  
T2 0.00  
T3 90.00  
T4 100.00  
EXMOD SINGL  
EXPCM Single pulse  
IRNUC 1H  
IRFRQ 500.00 MHz  
IRFIN 162410.00 Hz  
IRRPW 50 usec  
IRATN 511  
DFILE C:\Documents and Settings\ALPHA\11-11-11\UozumiG\Hamasaka\OTHPBr2-13C.als  
SHMFL TH5ATFG2\_0OTP\_Ph.Br2  
LKFIN 70334.0 Hz  
LKLEV 180  
LGAIN 21  
LKPHS 201  
LKSIG 710  
CSPED 14 Hz  
FILDC  
FILDF

### <sup>1</sup>H NMR of 3,5-didodecyl(tetrahydro-2H-pyran-2-yloxy)benzene (20)

C:\Documents and Settings\ALPHA\11-11-11\UozumiG\Hamasaka\data\C12H25\_2\_C6H3\_OTHP-1H-NMR.als  
C12H25\_2\_C6H3\_OTHP-1H

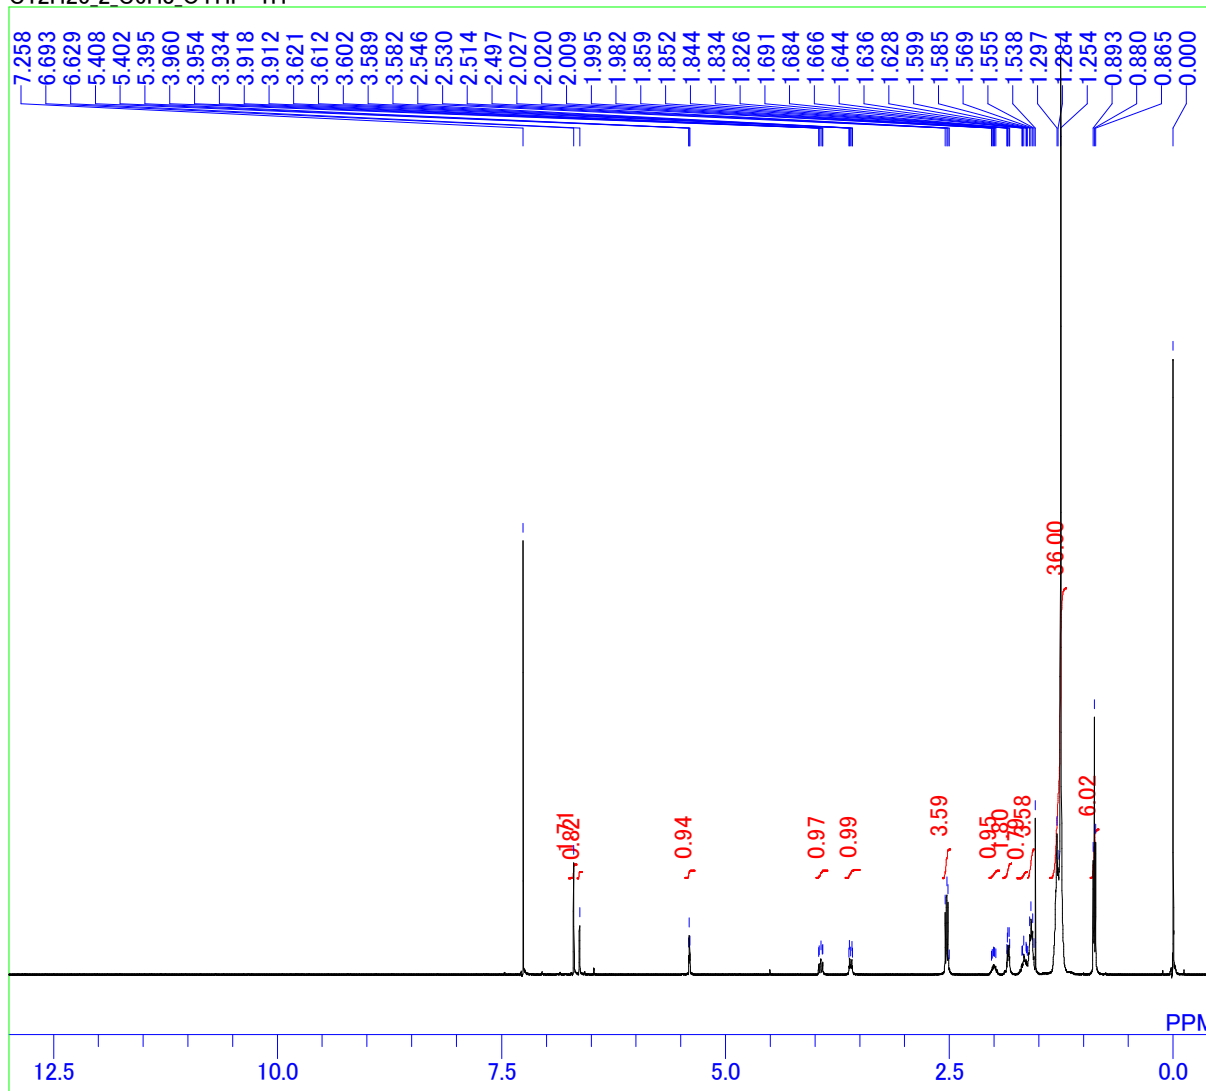

|       |                                                                         |
|-------|-------------------------------------------------------------------------|
| MENUF | non_th5atTH5ATFG2                                                       |
| OBNUC | 1H                                                                      |
| OBFRQ | 500.00 MHz                                                              |
| OBFIN | 162410.00 Hz                                                            |
| PW1   | 6.40 usec                                                               |
| DEADT | 56.80 usec                                                              |
| PREDL | 0.20000 msec                                                            |
| INIWT | 10.0000 msec                                                            |
| POINT | 16384                                                                   |
| SAMPO | 16384                                                                   |
| TIMES | 16                                                                      |
| DUMMY | 1                                                                       |
| FREQU | 10000.00 Hz                                                             |
| FILTR | 5000 Hz                                                                 |
| DELAY | 40.00 usec                                                              |
| ACQTM | 10.0000 sec                                                             |
| PD    | 12.0000 sec                                                             |
| ADBIT | 16                                                                      |
| RGAIN | 20                                                                      |
| BF    | 0.00 Hz                                                                 |
| T1    | 0.00                                                                    |
| T2    | 0.00                                                                    |
| T3    | 90.00                                                                   |
| T4    | 100.00                                                                  |
| EXMOD | SINGL                                                                   |
| EXPCM | Single pulse                                                            |
| IRNUC | 1H                                                                      |
| IRFRQ | 500.00 MHz                                                              |
| IRFIN | 162410.00 Hz                                                            |
| IRRPW | 50 usec                                                                 |
| IRATN | 511                                                                     |
| DFILE | C:\Documents and Settings\ALPHA\11-11-11\UozumiG\Hamasaka\data\TH5ATFG2 |
| SHMFL | TH5ATFG2                                                                |
| LKFIN | 70334.0 Hz                                                              |
| LKLEV | 180                                                                     |
| LGAIN | 22                                                                      |
| LKPHS | 214                                                                     |
| LKSIG | 913                                                                     |
| CSPED | 16 Hz                                                                   |
| FILDC |                                                                         |
| FILDF |                                                                         |

### <sup>13</sup>C NMR of 3,5-didodecyl(tetrahydro-2H-pyran-2-yloxy)benzene (20)

C:\Documents and Settings\ALPHA\11-11-11\UozumiG\Hamasaka\OTHP\_Ph\_C12H25\_2-13C.als  
C12H25OTHP-13C

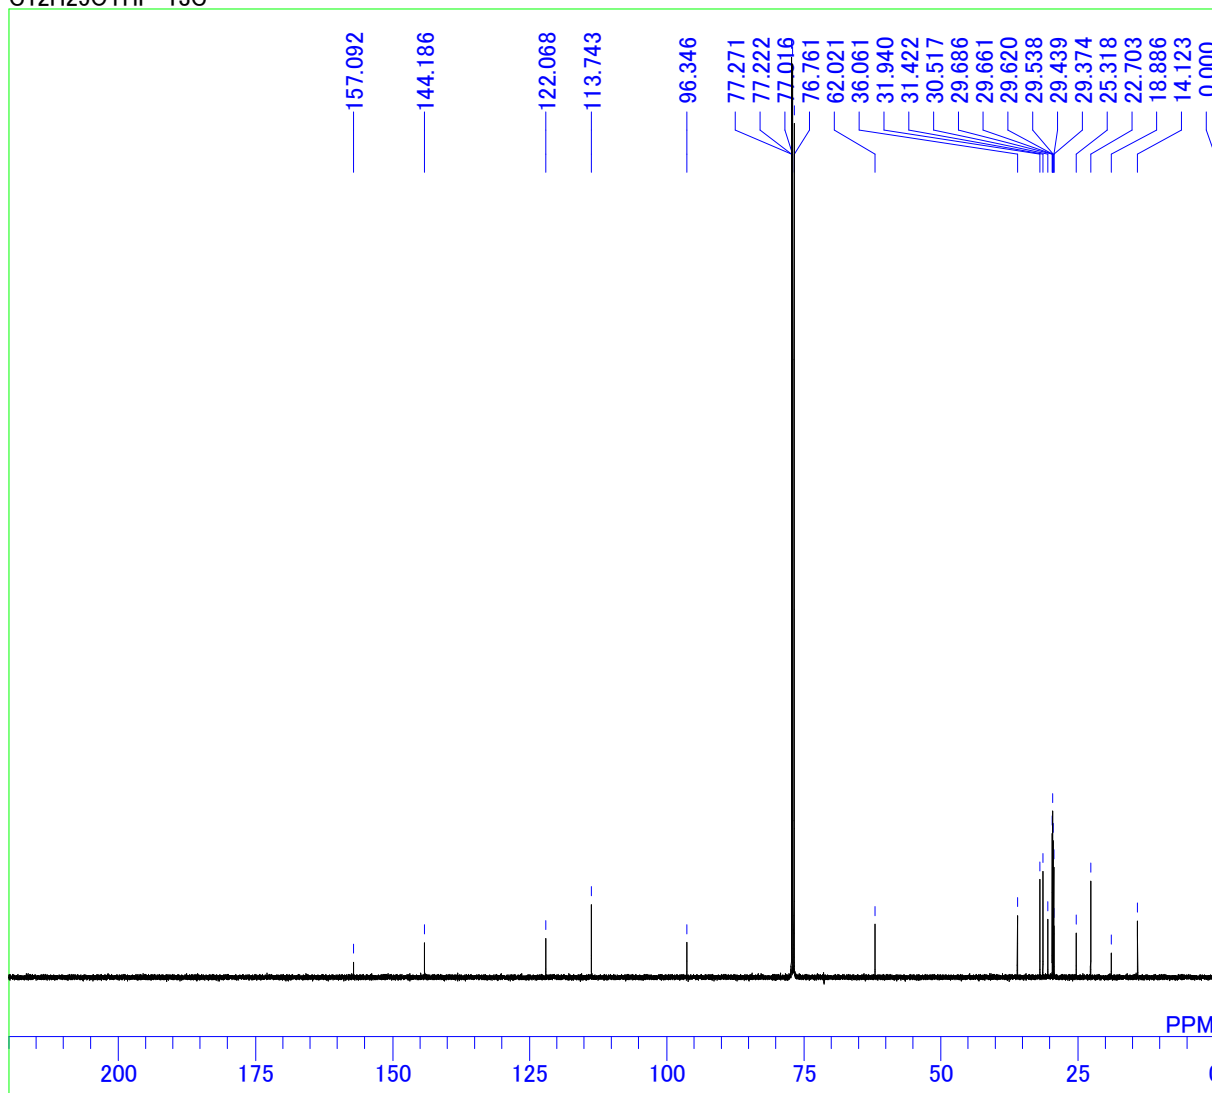

MENUF bcm\_th5atfTH5ATFG2  
OBNUC 13C  
OBFRQ 125.65 MHz  
OBFIN 127958.00 Hz  
PW1 5.75 usec  
DEADT 10.00 usec  
PREDL 0.20000 msec  
INIWT 10.0000 msec  
POINT 32768  
SAMPO 32768  
TIMES 20000  
DUMMY 1  
FREQU 33898.30 Hz  
FILTR 16950 Hz  
DELAY 11.80 usec  
ACQTM 0.9667 sec  
PD 1.0000 sec  
ADBIT 16  
RGAIN 26  
BF 0.00 Hz  
T1 0.00  
T2 0.00  
T3 90.00  
T4 100.00  
EXMOD SINGL  
EXPCM Single pulse  
IRNUC 1H  
IRFRQ 500.00 MHz  
IRFIN 162410.00 Hz  
IRRPW 50 usec  
IRATN 511  
DFILE C:\Documents and Settings\ALPHA\11-11-11\UozumiG\Hamasaka\OTHP\_Ph\_C12H25\_2-13C.als  
SHMFL TH5ATFG2  
LKFIN 70334.0 Hz  
LKLEV 180  
LGAIN 20  
LKPHS 214  
LKSIG 565  
CSPED 15 Hz  
FILDC  
FILDF

### <sup>1</sup>H NMR of 3,5-didodecylphenol (21)

C:\Documents and Settings\ALPHA\11-11-11\UozumiG\Hamasaka\data\C12H25\_2\_C6H3\_OH-1H.als  
C12H25\_2\_C6H3\_OH-1H

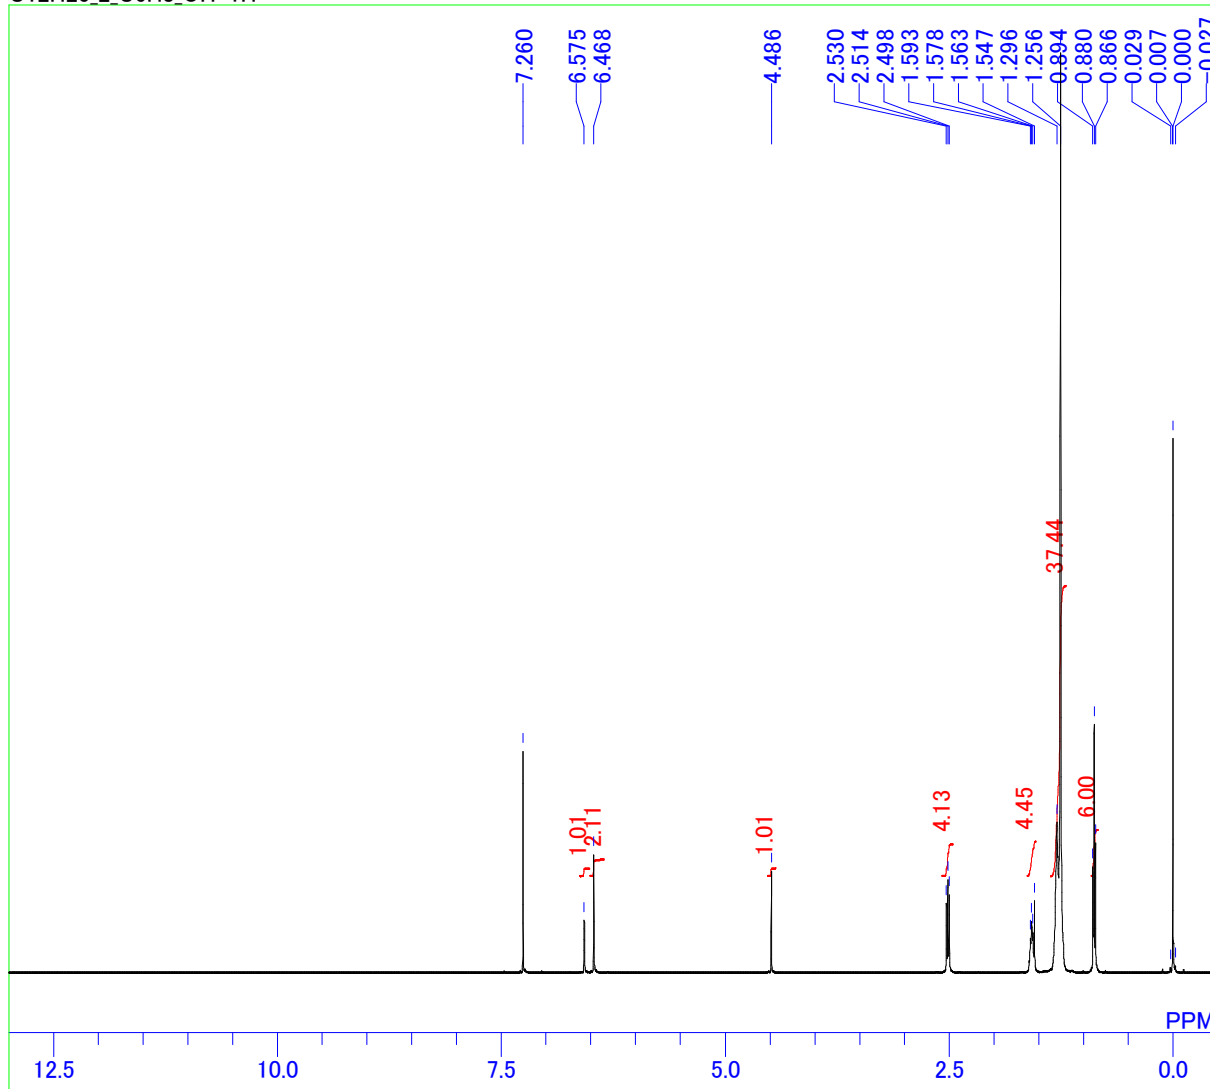

MENUF non\_th5atfTH5ATFG2  
OBNUC 1H  
OBFRQ 500.00 MHz  
OBFIN 162410.00 Hz  
PW1 6.40 usec  
DEADT 56.80 usec  
PREDL 0.20000 msec  
INIWT 10.0000 msec  
POINT 16384  
SAMPO 16384  
TIMES 16  
DUMMY 1  
FREQU 10000.00 Hz  
FILTR 5000 Hz  
DELAY 40.00 usec  
ACQTM 10.0000 sec  
PD 12.0000 sec  
ADBIT 16  
RGAIN 19  
BF 0.40 Hz  
T1 0.00  
T2 0.00  
T3 90.00  
T4 100.00  
EXMOD SINGL  
EXPCM Single pulse  
IRNUC 1H  
IRFRQ 500.00 MHz  
IRFIN 162410.00 Hz  
IRRPW 50 usec  
IRATN 511  
DFILE C:\Documents and Settings\ALPHA\11-11-11\UozumiG\Hamasaka\data\C12H25\_2\_C6H3\_OH-1H.als  
SHMFL TH5ATFG2  
LKFIN 70334.0 Hz  
LKLEV 180  
LGAIN 22  
LKPHS 214  
LKSIG 952  
CSPED 16 Hz  
FILDC  
FILDF

### <sup>13</sup>C NMR of 3,5-didodecylphenol (21)

C:\Documents and Settings\ALPHA\11-11-11\UozumiG\Hamasaka\GH-017-2-13C.als  
GH-017-2-13C

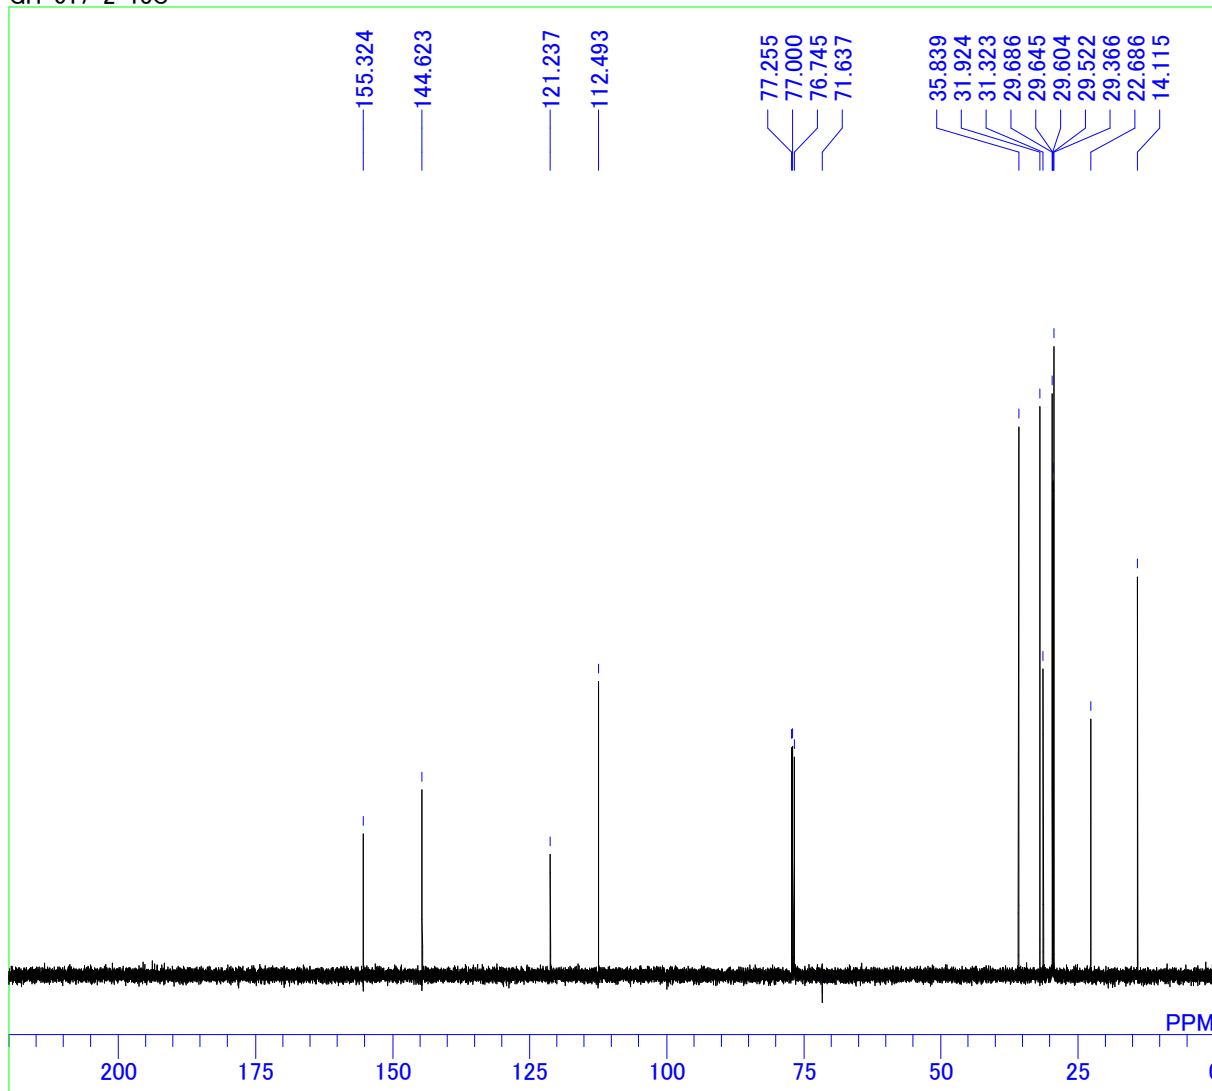

MENUF bcm\_th5atfTH5ATFG2  
OBNUC 13C  
OBFRQ 125.65 MHz  
OBFIN 127958.00 Hz  
PW1 5.75 usec  
DEADT 10.00 usec  
PREDL 0.20000 msec  
INIWT 10.0000 msec  
POINT 32768  
SAMPO 32768  
TIMES 512  
DUMMY 1  
FREQU 33898.30 Hz  
FILTR 16950 Hz  
DELAY 11.80 usec  
ACQTM 0.9667 sec  
PD 1.0000 sec  
ADBIT 16  
RGAIN 25  
BF 0.00 Hz  
T1 0.00  
T2 0.00  
T3 90.00  
T4 100.00  
EXMOD SINGL  
EXPCM Single pulse  
IRNUC 1H  
IRFRQ 500.00 MHz  
IRFIN 162410.00 Hz  
IRRPW 50 usec  
IRATN 511  
DFILE C:\Documents and Settings\ALPHA\11-11-11\UozumiG\Hamasaka\GH-017-2-13C.als  
SHMFL TH5ATFG2  
LKFIN 70334.0 Hz  
LKLEV 180  
LGAIN 21  
LKPHS 228  
LKSIG 688  
CSPED 12 Hz  
FILDC  
FILDF

### <sup>1</sup>H NMR of 3,5-didodecyl-2,6-diformylphenol (22)

C:\Documents and Settings\ALPHA\1-1-1-1\UozumiG\Hamasaki\dialdehyde-1H.als  
dialdehyde

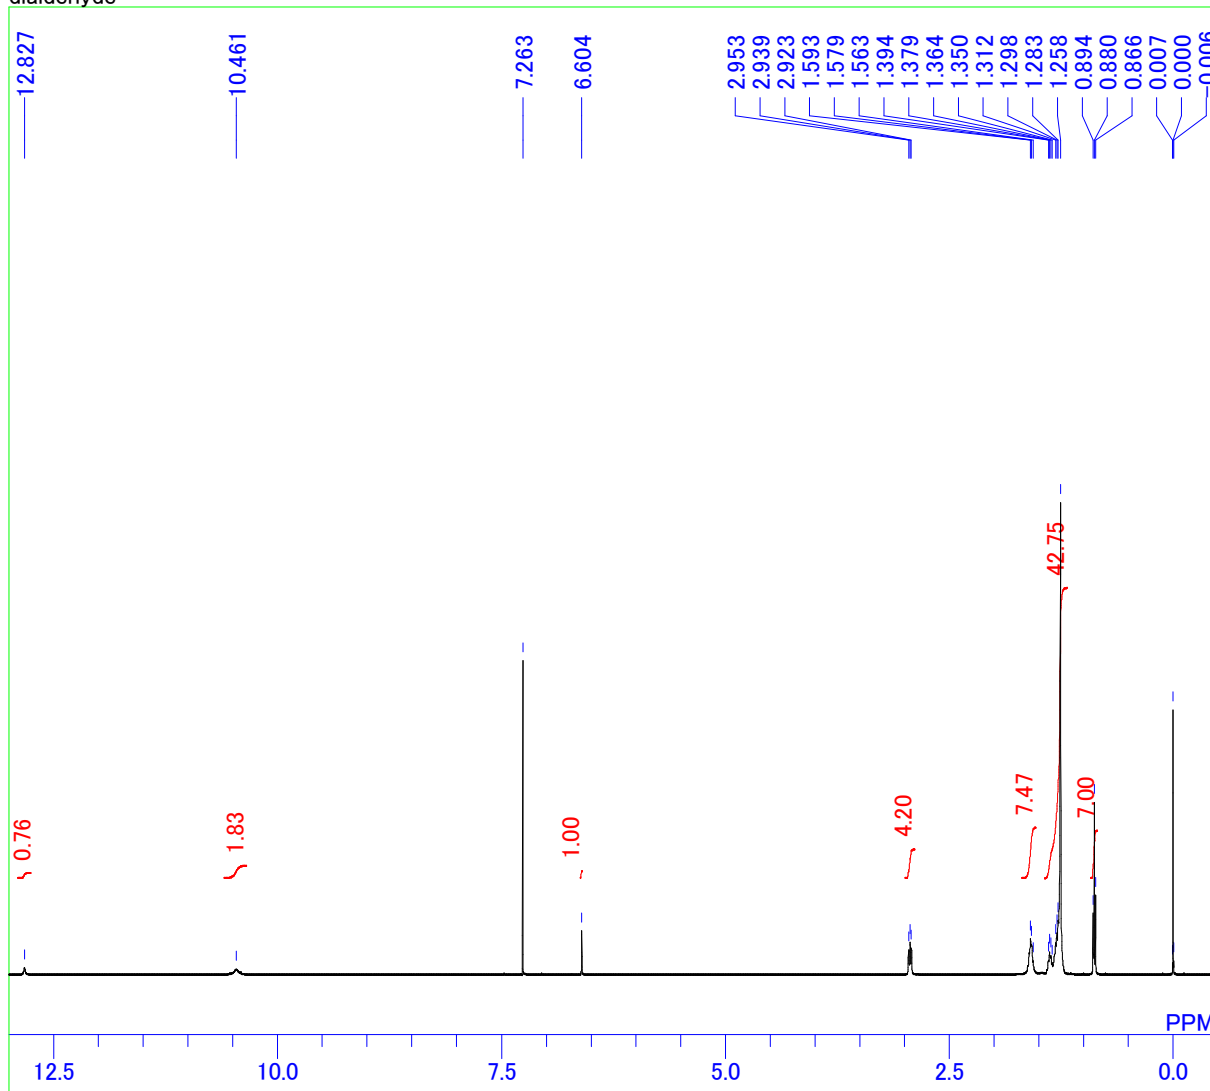

MENUF non\_th5atfTH5ATFG2\_0dialdehyde  
OBNUC 1H  
OBFRQ 500.00 MHz  
OBFIN 162410.00 Hz  
PW1 6.40 usec  
DEADT 56.80 usec  
PREDL 0.20000 msec  
INIWT 10.0000 msec  
POINT 16384  
SAMPO 16384  
TIMES 32  
DUMMY 1  
FREQU 10000.00 Hz  
FILTR 5000 Hz  
DELAY 40.00 usec  
ACQTM 10.0000 sec  
PD 12.0000 sec  
ADBIT 16  
RGAIN 18  
BF 0.00 Hz  
T1 0.00  
T2 0.00  
T3 90.00  
T4 100.00  
EXMOD SINGL  
EXPCM Single pulse  
IRNUC 1H  
IRFRQ 500.00 MHz  
IRFIN 162410.00 Hz  
IRRPW 50 usec  
IRATN 511  
DFILE C:\Documents and Settings\ALPHA\1  
SHMFL TH5ATFG2\_0dialdehyde  
LKFIN 70334.0 Hz  
LKLEV 180  
LGAIN 25  
LKPHS 201  
LKSIG 2265  
CSPED 11 Hz  
FILDC  
FILDF



### <sup>13</sup>C NMR of 3,5-didodecyl-2,6-diformylphenol (22)

C:\Documents and Settings\ALPHA\11-11-11\UozumiG\Hamasaka\data\C12H25\_2\_C6H1\_CHO\_2\_OH-13C.als  
C12H25\_2\_C6H1\_CHO\_2\_OH-13C

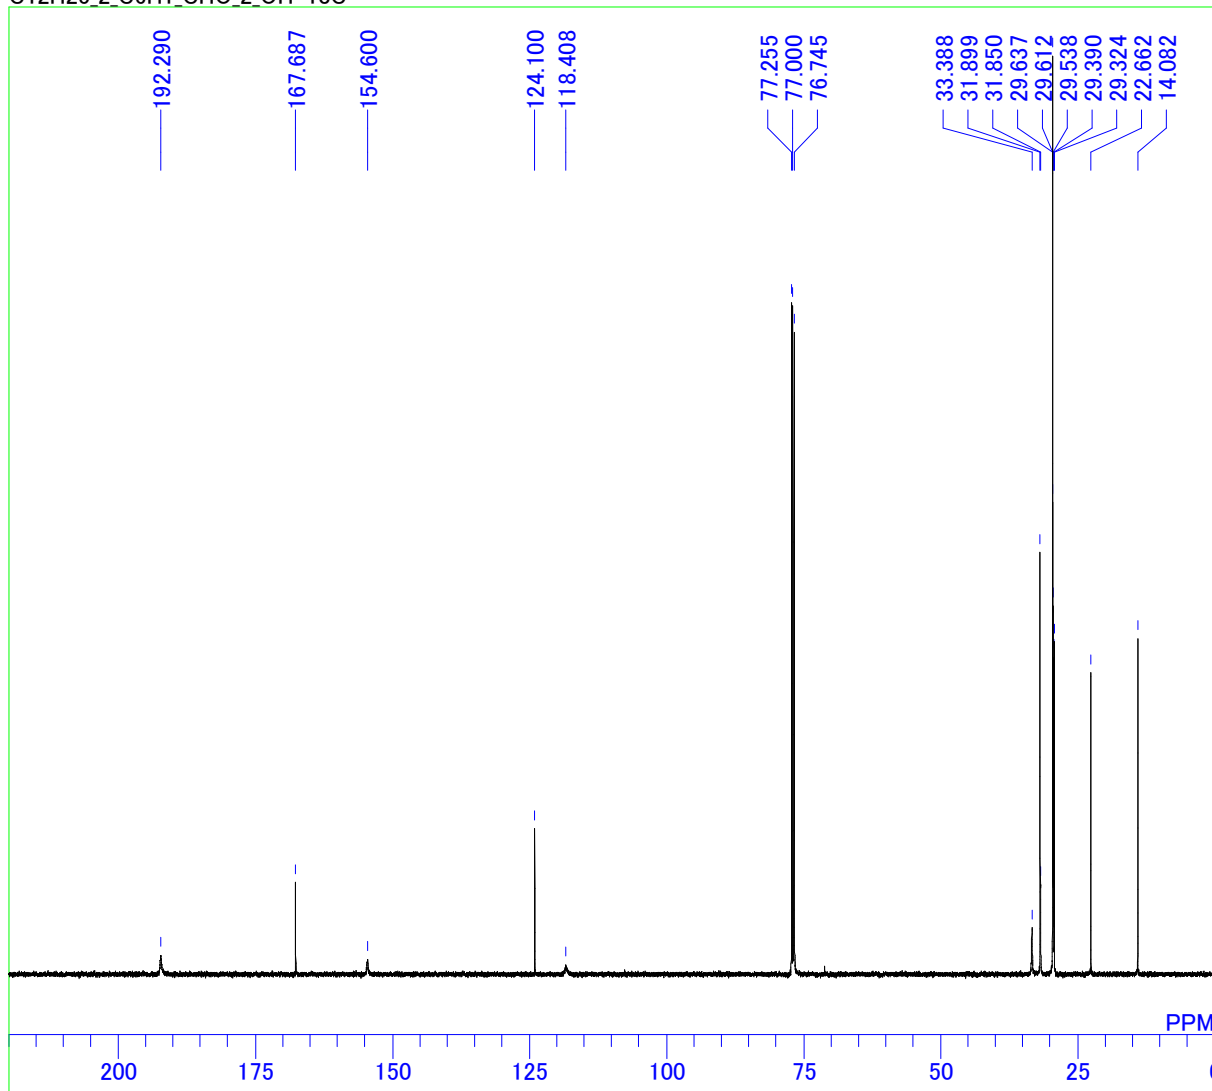

MENUF bcm\_th5atfTH5ATFG2  
OBNUC 13C  
OBFRQ 125.65 MHz  
OBFIN 127958.00 Hz  
PW1 5.75 usec  
DEADT 10.00 usec  
PREDL 0.20000 msec  
INIWT 10.0000 msec  
POINT 32768  
SAMPO 32768  
TIMES 20000  
DUMMY 1  
FREQU 33898.30 Hz  
FILTR 16950 Hz  
DELAY 11.80 usec  
ACQTM 0.9667 sec  
PD 1.0000 sec  
ADBIT 16  
RGAIN 27  
BF 1.50 Hz  
T1 0.00  
T2 0.00  
T3 90.00  
T4 100.00  
EXMOD SINGL  
EXPCM Single pulse  
IRNUC 1H  
IRFRQ 500.00 MHz  
IRFIN 162410.00 Hz  
IRRPW 50 usec  
IRATN 511  
DFILE C:\Documents and Settings\ALPHA\11-11-11\UozumiG\Hamasaka\data\C12H25\_2\_C6H1\_CHO\_2\_OH-13C.als  
SHMFL TH5ATFG2  
LKFIN 70334.0 Hz  
LKLEV 180  
LGAIN 25  
LKPHS 214  
LKSIG 2132  
CSPED 15 Hz  
FILDC  
FILDF

### <sup>1</sup>H NMR of 3,5-didodecyl-2,6-diformylphenyl trifluoromethanesulfonate (23)

C:\Documents and Settings\ALPHA\1-1-1-1\UozumiG\Hamasaka\data\C12H25\_2\_C6H1\_CHO\_2\_OTf-1H.als  
C12H25\_2\_C6H1\_CHO\_2\_OTf-1H

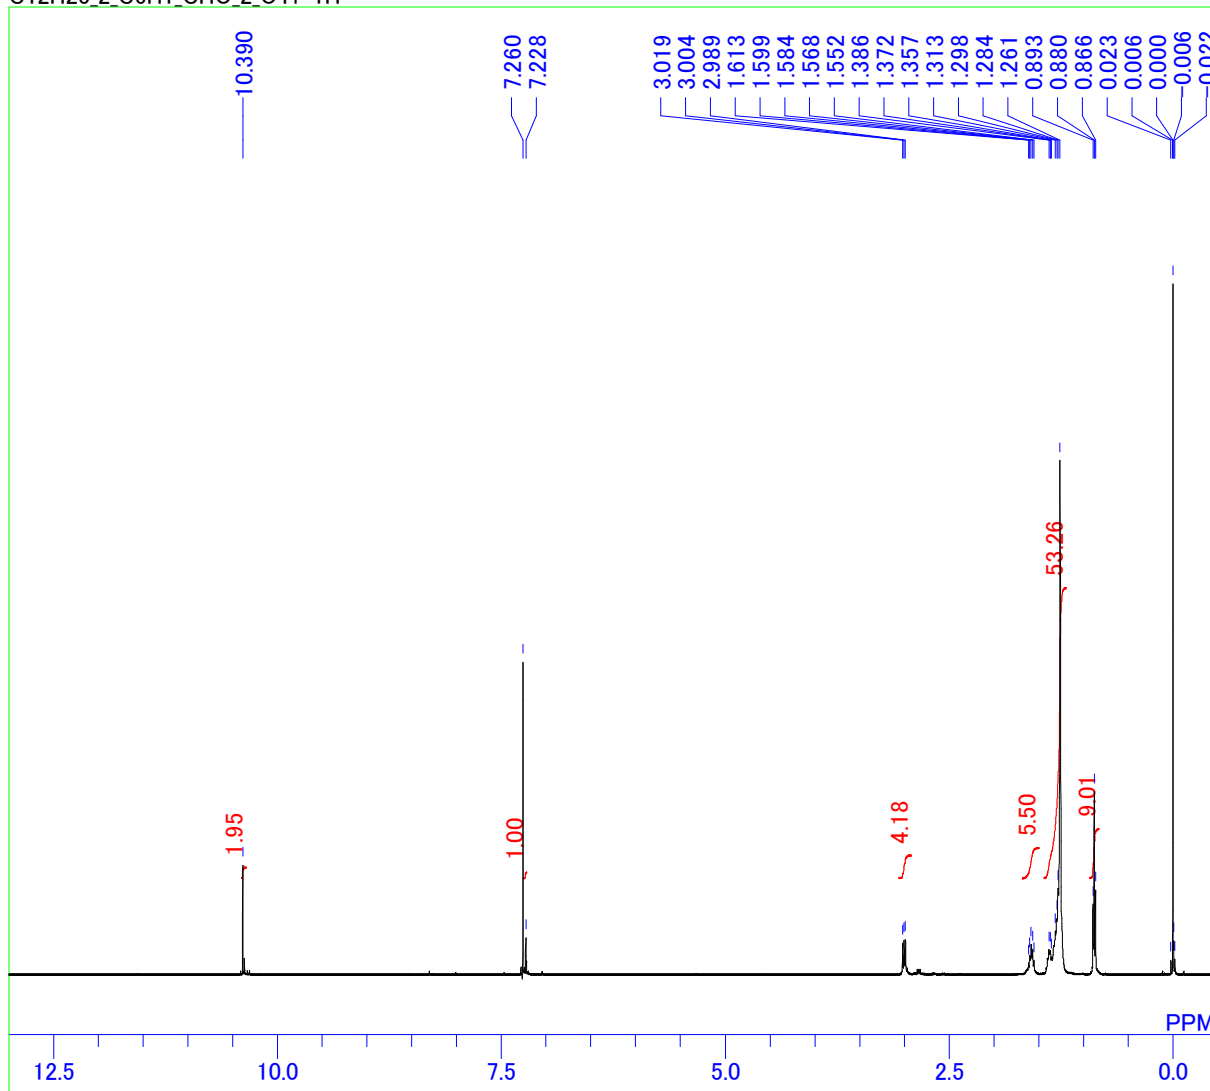

MENUF non\_th5atfTH5ATFG2  
OBNUC 1H  
OBFRQ 500.00 MHz  
OBFIN 162410.00 Hz  
PW1 6.40 usec  
DEADT 56.80 usec  
PREDL 0.20000 msec  
INIWT 10.0000 msec  
POINT 16384  
SAMPO 16384  
TIMES 16  
DUMMY 1  
FREQU 10000.00 Hz  
FILTR 5000 Hz  
DELAY 40.00 usec  
ACQTM 10.0000 sec  
PD 12.0000 sec  
ADBIT 16  
RGAIN 20  
BF 0.00 Hz  
T1 0.00  
T2 0.00  
T3 90.00  
T4 100.00  
EXMOD SINGL  
EXPCM Single pulse  
IRNUC 1H  
IRFRQ 500.00 MHz  
IRFIN 162410.00 Hz  
IRRPW 50 usec  
IRATN 511  
DFILE C:\Documents and Settings\ALPHA\1  
SHMFL TH5ATFG2  
LKFIN 70334.0 Hz  
LKLEV 180  
LGAIN 21  
LKPHS 214  
LKSIG 755  
CSPED 12 Hz  
FILDC  
FILDF

### <sup>13</sup>C NMR of 3,5-didodecyl-2,6-diformylphenyl trifluoromethanesulfonate (23)

C:\Documents and Settings\ALPHA\11-11-11\UozumiG\Hamasaka\data\C12H25\_2\_C6H1\_CHO\_2\_OTf-13C.als  
C12H25\_2\_C6H1\_CHO\_2\_OTf-13C

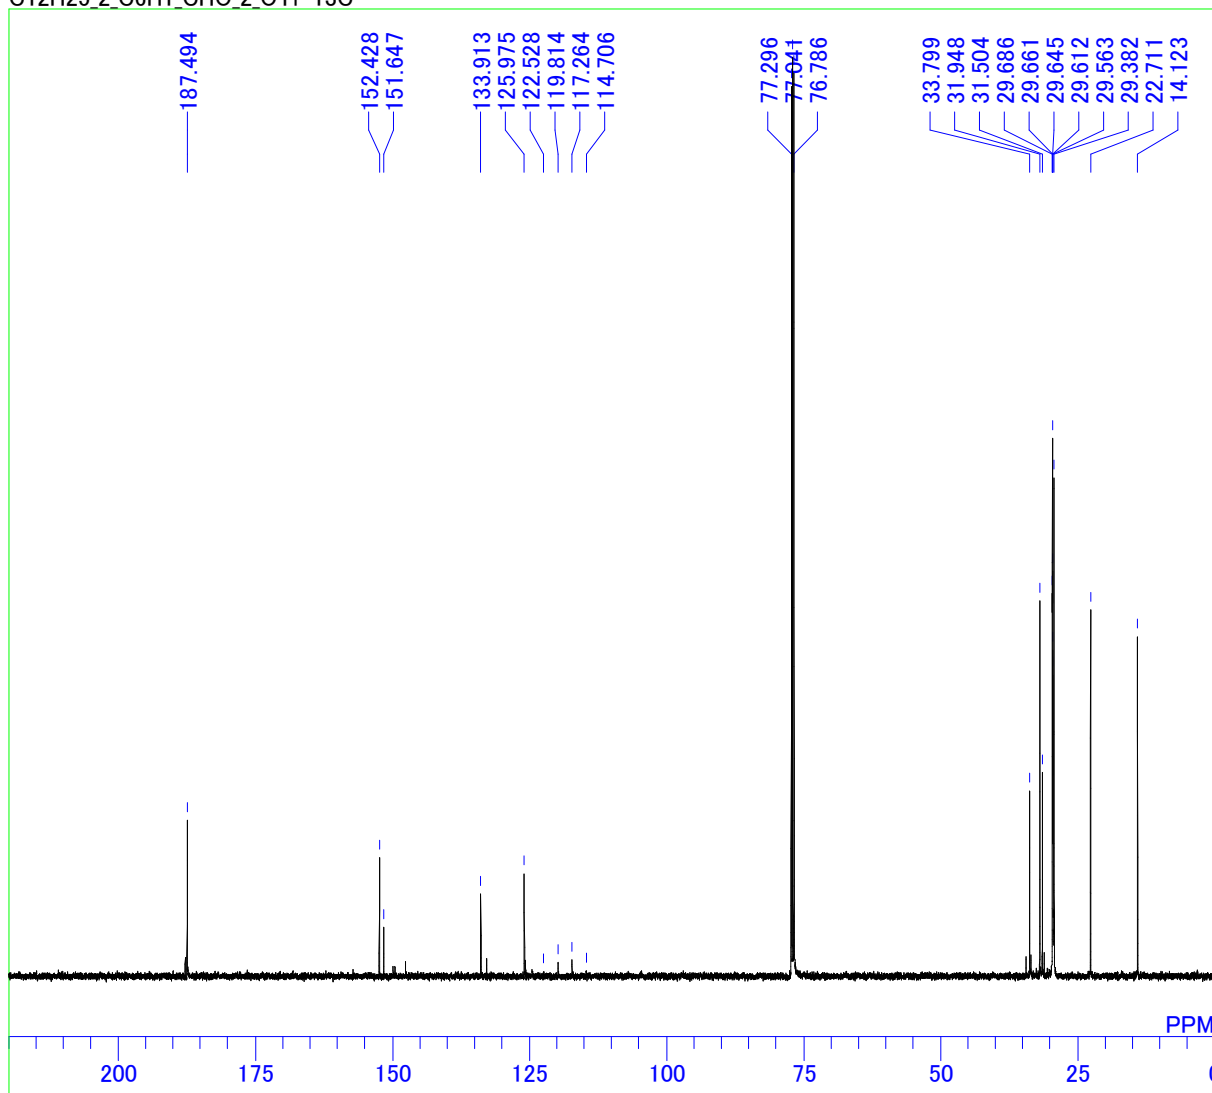

MENUF bcm\_th5atfTH5ATFG2  
OBNUC 13C  
OBFRQ 125.65 MHz  
OBFIN 127958.00 Hz  
PW1 5.75 usec  
DEADT 10.00 usec  
PREDL 0.20000 msec  
INIWT 10.0000 msec  
POINT 32768  
SAMPO 32768  
TIMES 20000  
DUMMY 1  
FREQU 33898.30 Hz  
FILTR 16950 Hz  
DELAY 11.80 usec  
ACQTM 0.9667 sec  
PD 1.0000 sec  
ADBIT 16  
RGAIN 27  
BF 1.50 Hz  
T1 0.00  
T2 0.00  
T3 90.00  
T4 100.00  
EXMOD SINGL  
EXPCM Single pulse  
IRNUC 1H  
IRFRQ 500.00 MHz  
IRFIN 162410.00 Hz  
IRRPW 50 usec  
IRATN 511  
DFILE C:\Documents and Settings\ALPHA\1  
SHMFL TH5ATFG2  
LKFIN 70334.0 Hz  
LKLEV 180  
LGAIN 21  
LKPHS 214  
LKSIG 678  
CSPED 16 Hz  
FILDC  
FILDF

### <sup>1</sup>H NMR of *trans*-(3,5-didodecyl-2,6-diformylphenyl)chlorobis(triphenylphosphine)palladium (7)

C:\Documents and Settings\ALPHA\11-11-11\UozumiG\Hamasa\data\C12H25\_2\_C6H1\_CHO\_2\_PdCl(PPh3)2-1H-.als  
C12H25\_2\_C6H1\_CHO\_2\_PdCl(PPh3)2-1H

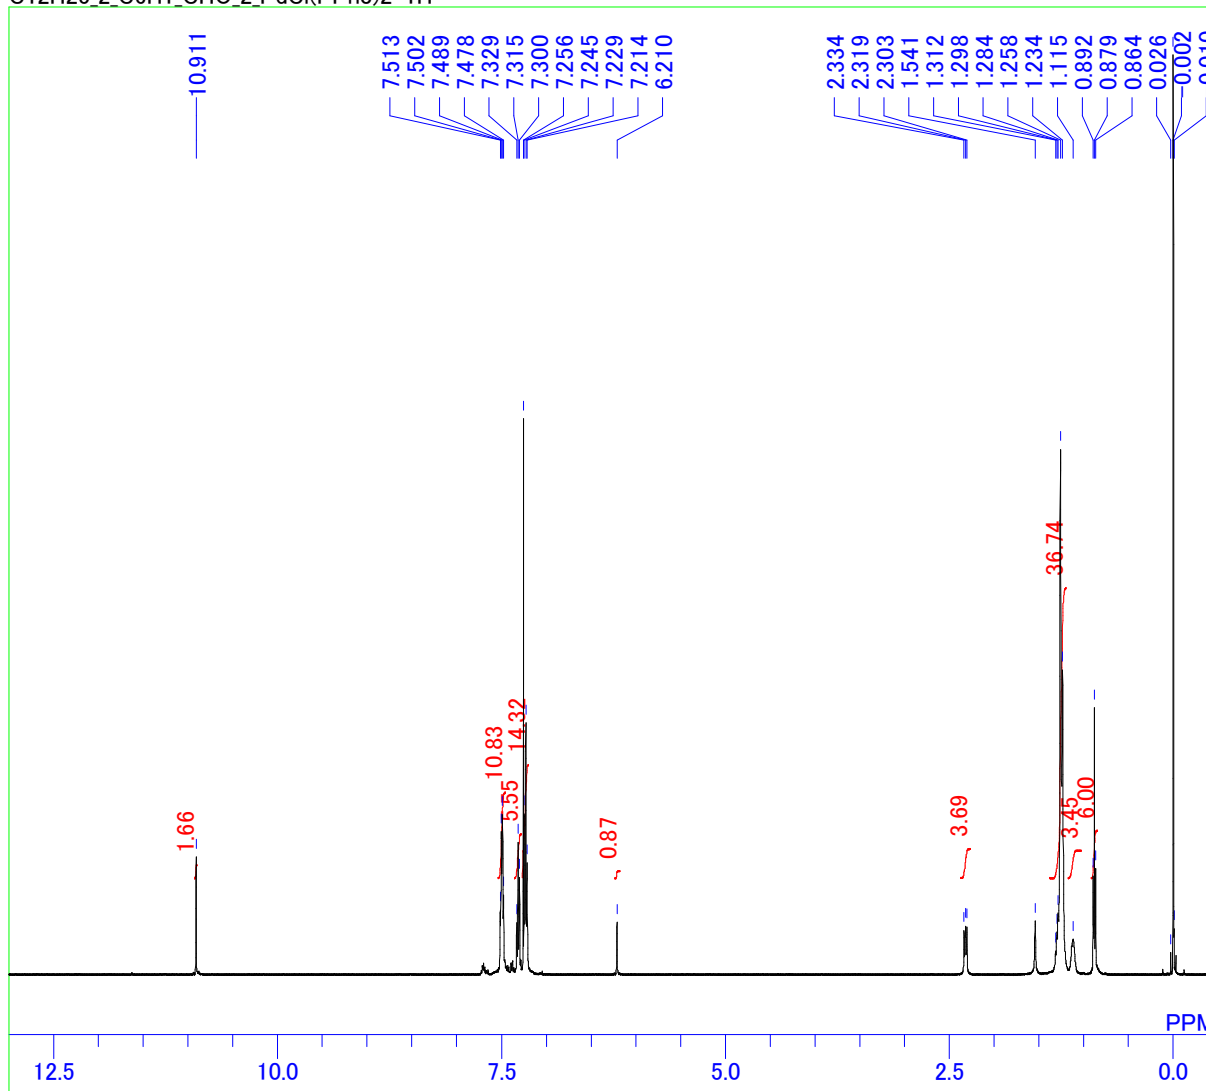

MENUF non\_th5atTH5ATFG2  
OBNUC 1H  
OBFRQ 500.00 MHz  
OBFIN 162410.00 Hz  
PW1 6.40 usec  
DEADT 56.80 usec  
PREDL 0.20000 msec  
INIWT 10.0000 msec  
POINT 16384  
SAMPO 16384  
TIMES 16  
DUMMY 1  
FREQU 10000.00 Hz  
FILTR 5000 Hz  
DELAY 40.00 usec  
ACQTM 10.0000 sec  
PD 12.0000 sec  
ADBIT 16  
RGAIN 19  
BF 0.00 Hz  
T1 0.00  
T2 0.00  
T3 90.00  
T4 100.00  
EXMOD SINGL  
EXPCM Single pulse  
IRNUC 1H  
IRFRQ 500.00 MHz  
IRFIN 162410.00 Hz  
IRRPW 50 usec  
IRATN 511  
DFILE C:\Documents and Settings\ALPHA\11-11-11\UozumiG\Hamasa\data\TH5ATFG2  
SHMFL TH5ATFG2  
LKFIN 70334.0 Hz  
LKLEV 180  
LGAIN 21  
LKPHS 214  
LKSIG 652  
CSPED 14 Hz  
FILDC  
FILDF

### <sup>13</sup>C NMR of *trans*-(3,5-didodecyl-2,6-diformylphenyl)chlorobis(triphenylphosphine)palladium (7)

C:\Documents and Settings\ALPHA\11-11-11\UozumiG\Hamasa\data\C12H25\_2\_C6H1\_CHO\_2\_PdCl(PPh3)2-13C.als  
C12H25\_2\_C6H1\_CHO\_2\_PdCl(PPh3)2-13C

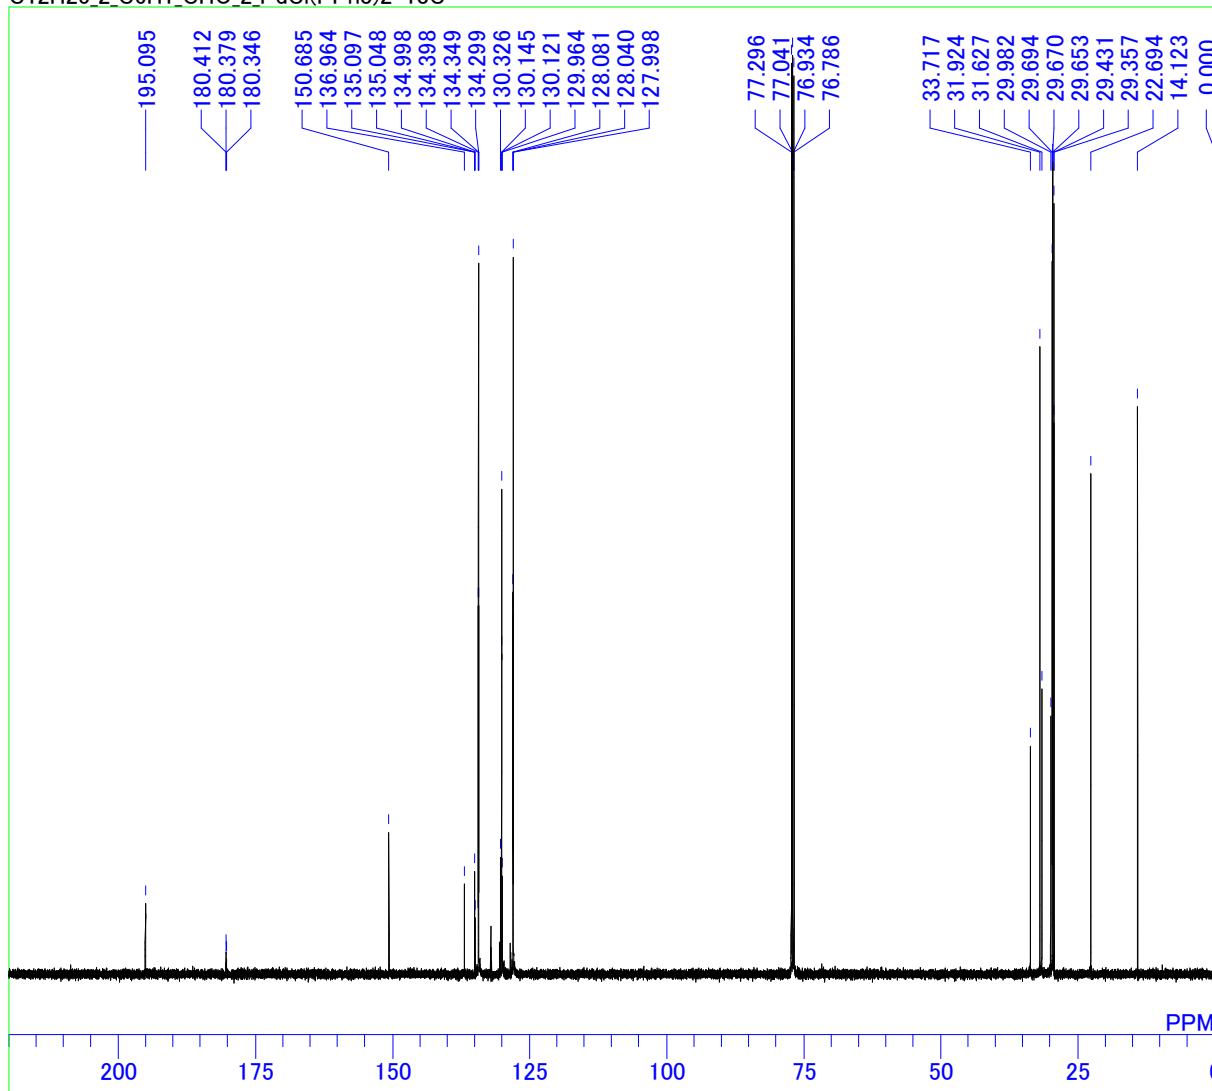

MENUF bcm\_th5atfTH5ATFG2  
OBNUC 13C  
OBFRQ 125.65 MHz  
OBFIN 127958.00 Hz  
PW1 5.75 usec  
DEADT 10.00 usec  
PREDL 0.20000 msec  
INIWT 10.0000 msec  
POINT 32768  
SAMPO 32768  
TIMES 20000  
DUMMY 1  
FREQU 33898.30 Hz  
FILTR 16950 Hz  
DELAY 11.80 usec  
ACQTM 0.9667 sec  
PD 1.0000 sec  
ADBIT 16  
RGAIN 27  
BF -0.10 Hz  
T1 0.00  
T2 0.00  
T3 90.00  
T4 100.00  
EXMOD SINGL  
EXPCM Single pulse  
IRNUC 1H  
IRFRQ 500.00 MHz  
IRFIN 162410.00 Hz  
IRRPW 50 usec  
IRATN 511  
DFILE C:\Documents and Settings\ALPHA\11-11-11\UozumiG\Hamasa\data\C12H25\_2\_C6H1\_CHO\_2\_PdCl(PPh3)2-13C.als  
SHMFL TH5ATFG2  
LKFIN 70334.0 Hz  
LKLEV 180  
LGAIN 26  
LKPHS 214  
LKSIG 2275  
CSPED 16 Hz  
FILDC  
FILDF

### <sup>1</sup>H NMR of 4-(2,5,8,11-tetraoxadodecyl)aniline (9)

C:\Documents and Settings\ALPHA\1-1-1-1\UozumiG\Hamasaka\data\4-TEG-aniline-1H-2.als

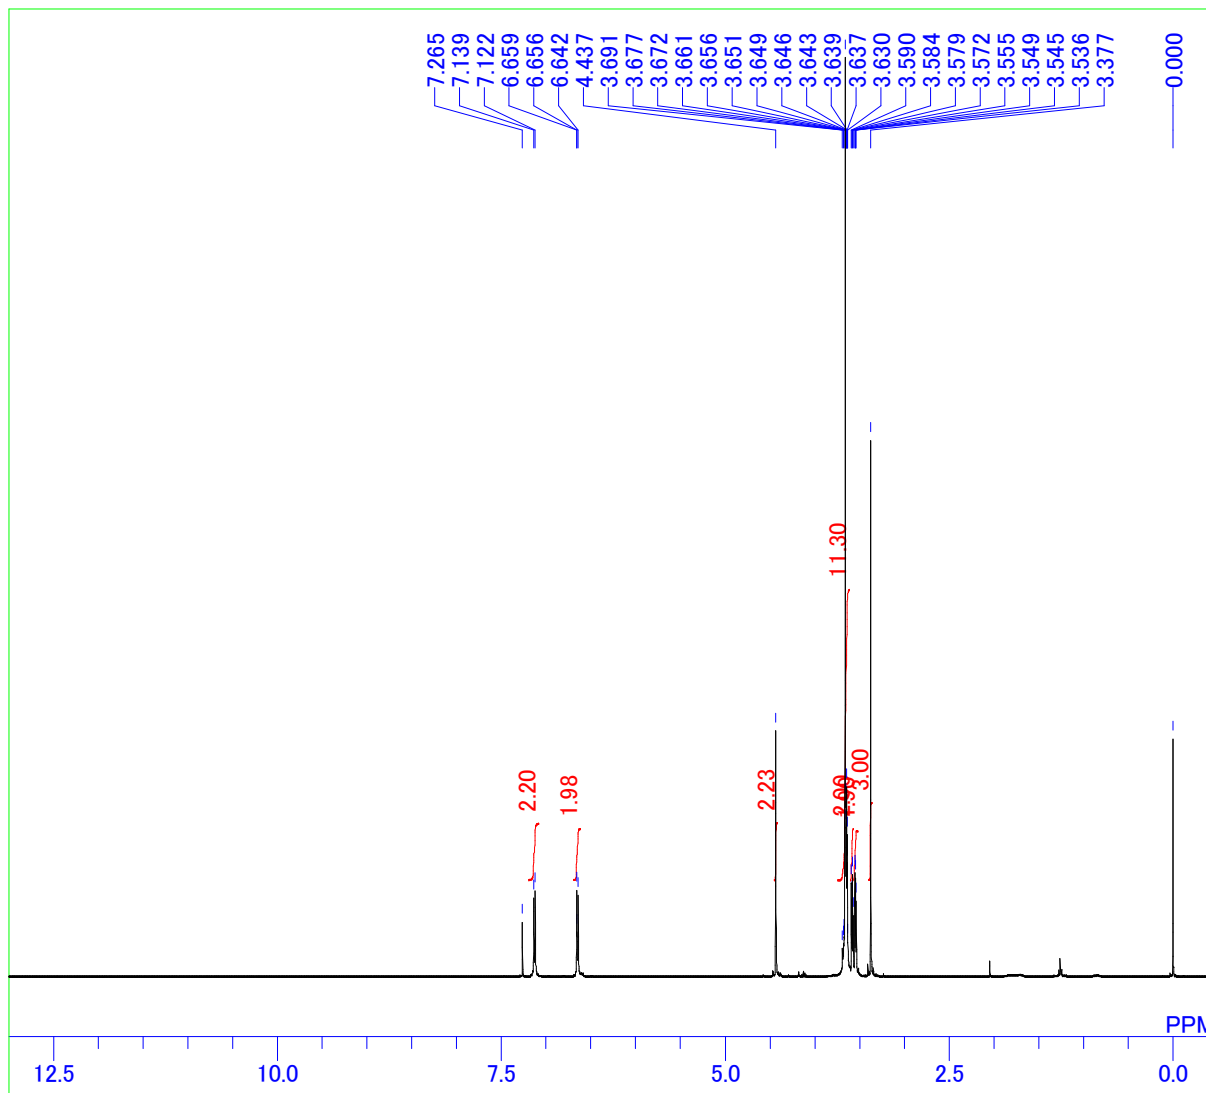

non\_th5atTH5ATFG2  
1H

|       |                                   |            |
|-------|-----------------------------------|------------|
| MENUF | OBNUC                             | 500.00 MHz |
| OBFRQ | 162410.00 Hz                      |            |
| OBFIN | 6.40 usec                         |            |
| PW1   | 56.80 usec                        |            |
| DEADT | 0.20000 msec                      |            |
| PREDL | 10.0000 msec                      |            |
| INIWT | 16384                             |            |
| POINT | 16384                             |            |
| SAMPO | 8                                 |            |
| TIMES | 1                                 |            |
| DUMMY | 10000.00 Hz                       |            |
| FREQU | 5000 Hz                           |            |
| FILTR | 40.00 usec                        |            |
| DELAY | 1.6384 sec                        |            |
| ACQTM | 2.0000 sec                        |            |
| PD    | 16                                |            |
| ADBIT | 16                                |            |
| RGAIN | 0.10 Hz                           |            |
| BF    | 0.00                              |            |
| T1    | 0.00                              |            |
| T2    | 90.00                             |            |
| T3    | 100.00                            |            |
| T4    | SINGL                             |            |
| EXMOD | Single pulse                      |            |
| EXPCM | 1H                                |            |
| IRNUC | 500.00 MHz                        |            |
| IRFRQ | 162410.00 Hz                      |            |
| IRFIN | 50 usec                           |            |
| IRRPW | 511                               |            |
| IRATN | C:\Documents and Settings\ALPHA\1 |            |
| DFILE | TH5ATFG2                          |            |
| SHMFL | 70334.0 Hz                        |            |
| LKFIN | 180                               |            |
| LKLEV | 22                                |            |
| LGAIN | 214                               |            |
| LKPHS | 959                               |            |
| LKSIG | 16 Hz                             |            |
| CSPED | FILDC                             |            |
| FILDF |                                   |            |

### <sup>13</sup>C NMR of 4-(2,5,8,11-tetraoxadodecyl)aniline (9)

C:\Documents and Settings\ALPHA\11-11-11\UozumiG\Hamasaka\data\4-TEG-aniline-13C.als  
4-TEG-aniline

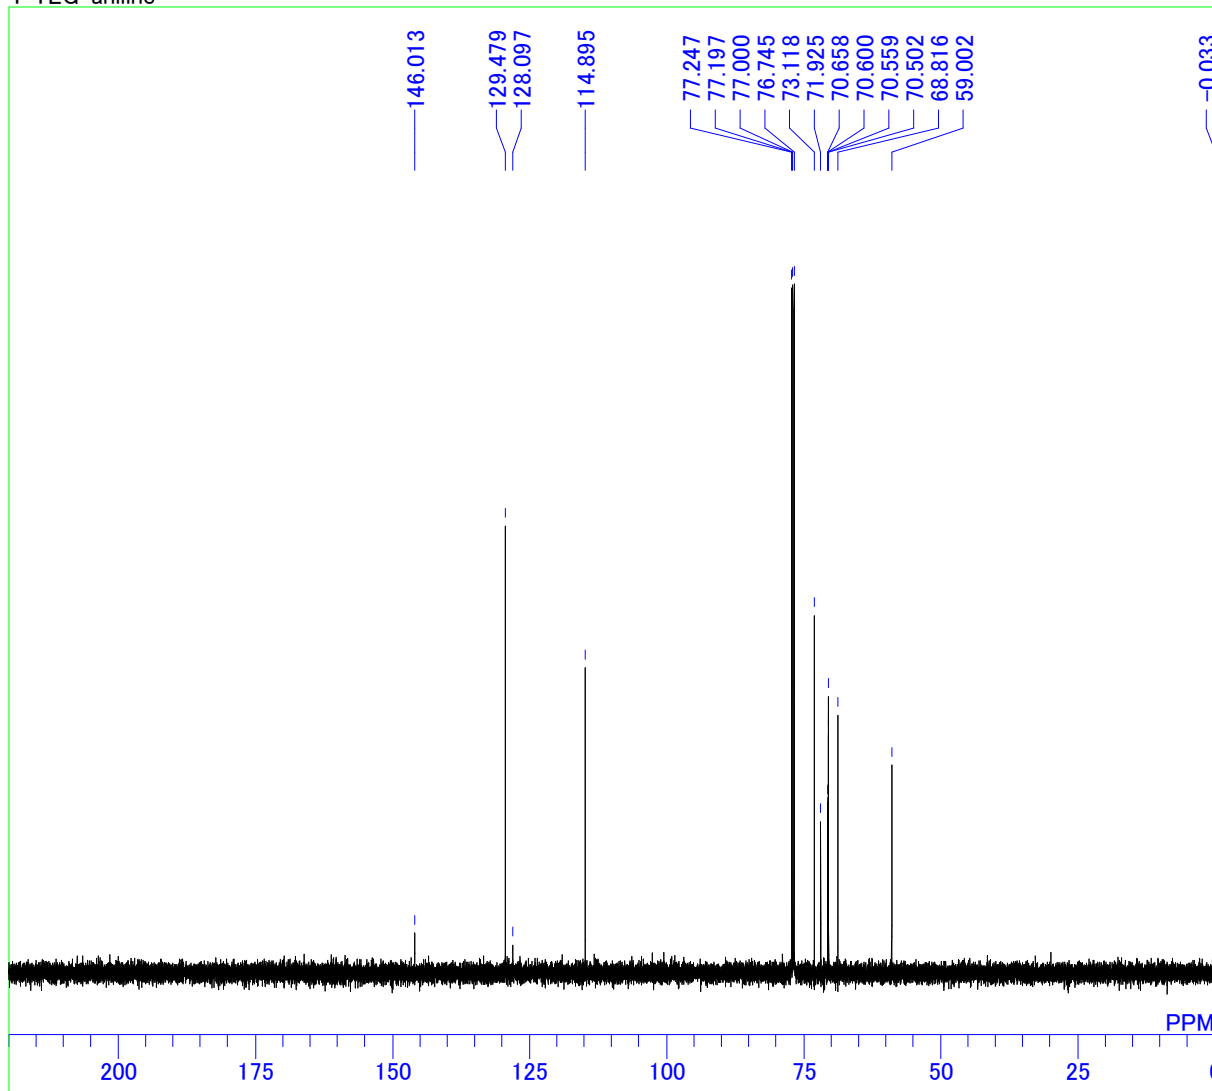

MENUF bcm\_th5atfTH5ATFG2  
OBNUC 13C  
OBFRQ 125.65 MHz  
OBFIN 127958.00 Hz  
PW1 5.75 usec  
DEADT 10.00 usec  
PREDL 0.20000 msec  
INIWT 10.0000 msec  
POINT 32768  
SAMPO 32768  
TIMES 10000  
DUMMY 1  
FREQU 33898.30 Hz  
FILTR 16950 Hz  
DELAY 11.80 usec  
ACQTM 0.9667 sec  
PD 1.0000 sec  
ADBIT 16  
RGAIN 27  
BF 0.00 Hz  
T1 0.00  
T2 0.00  
T3 90.00  
T4 100.00  
EXMOD SINGL  
EXPCM Single pulse  
IRNUC 1H  
IRFRQ 500.00 MHz  
IRFIN 162410.00 Hz  
IRRPW 50 usec  
IRATN 511  
DFILE C:\Documents and Settings\ALPHA\1  
SHMFL TH5ATFG2  
LKFIN 70334.0 Hz  
LKLEV 180  
LGAIN 22  
LKPHS 214  
LKSIG 953  
CSPED 17 Hz  
FILDC  
FILDF

### <sup>1</sup>H NMR of [3,5-bis(2,5,8,11-tetraoxadodecyl)-2,6-bis(*N*-4-dodecylphenylimino)phenyl]chloropalladium (4)

C:\Documents and Settings\ALPHA\1-1-1-1\UozumiG\muto\TM6001-TM6013-01.als

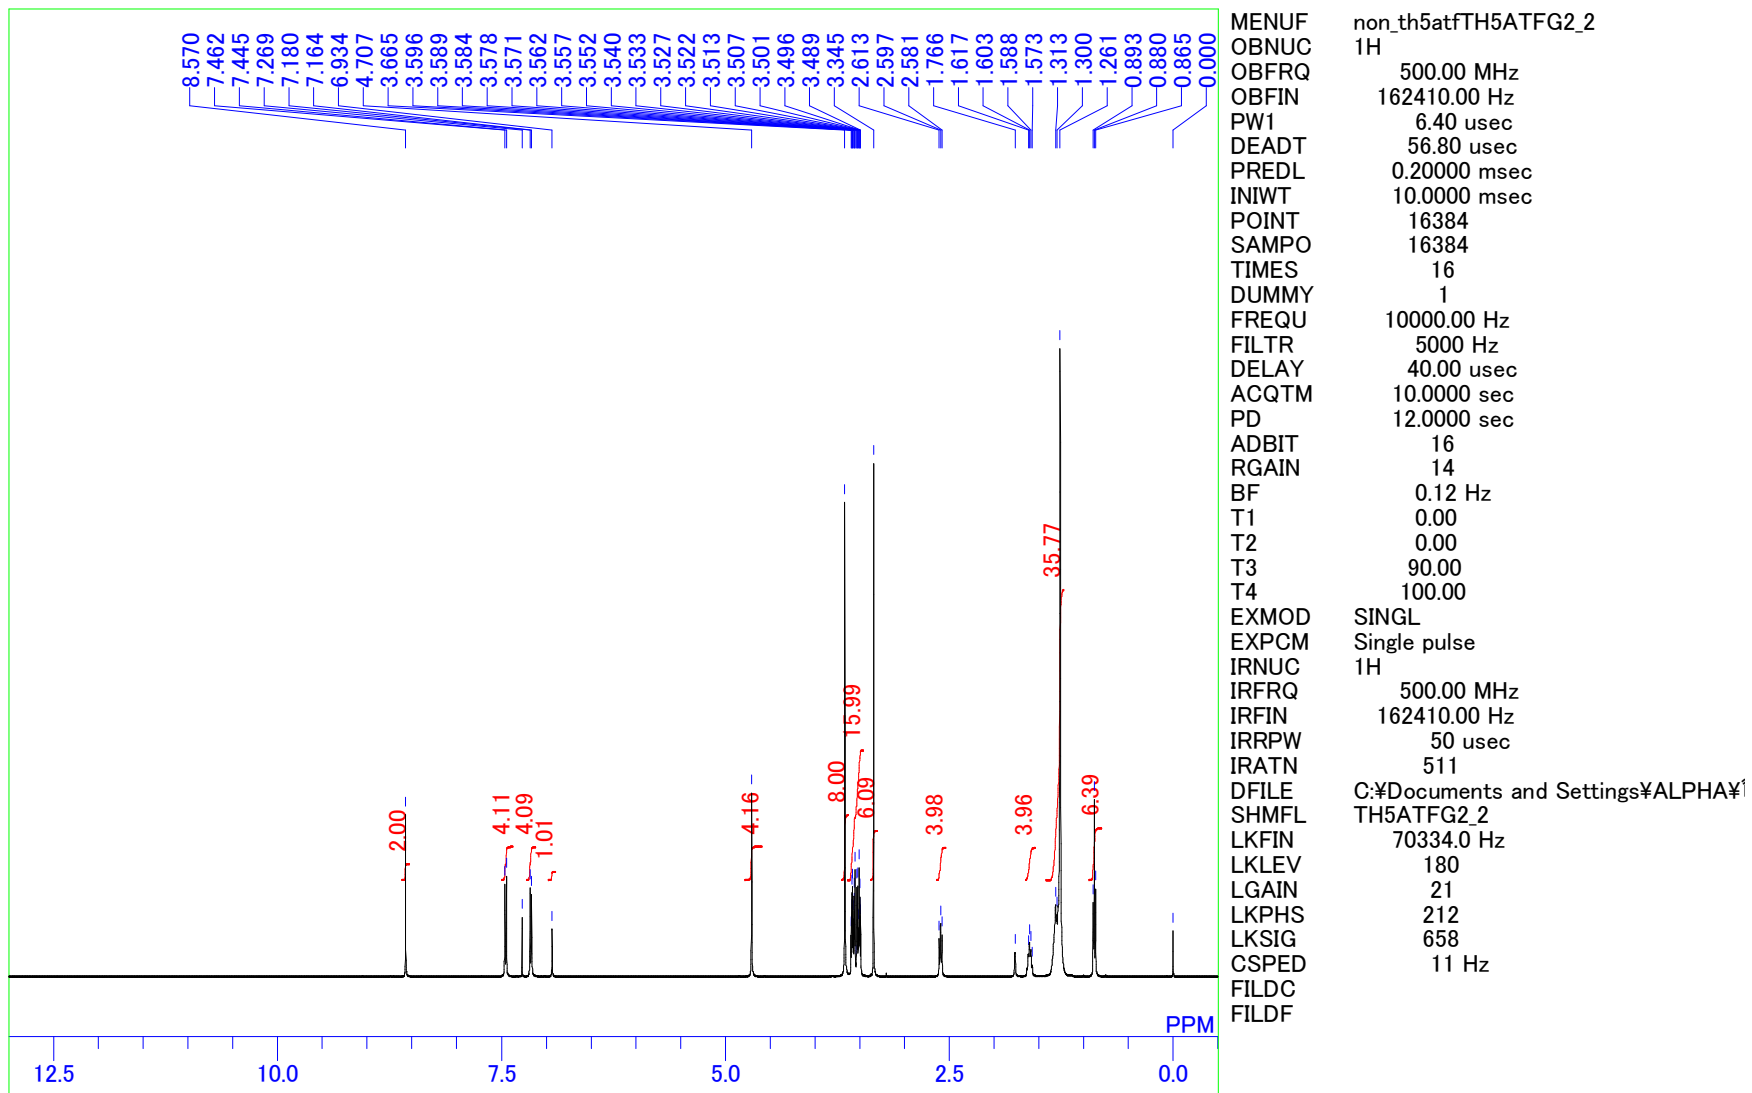



### <sup>13</sup>C NMR of [3,5-bi(2,5,8,11-tetraoxadodecyl)-2,6-bis(*N*-4-dodecylphenylimino)phenyl]chloropalladium (4)

C:\Documents and Settings\ALPHA\11-11-11\UozumiG\muto\full data\PincerPd(TM6013-01-13c).als

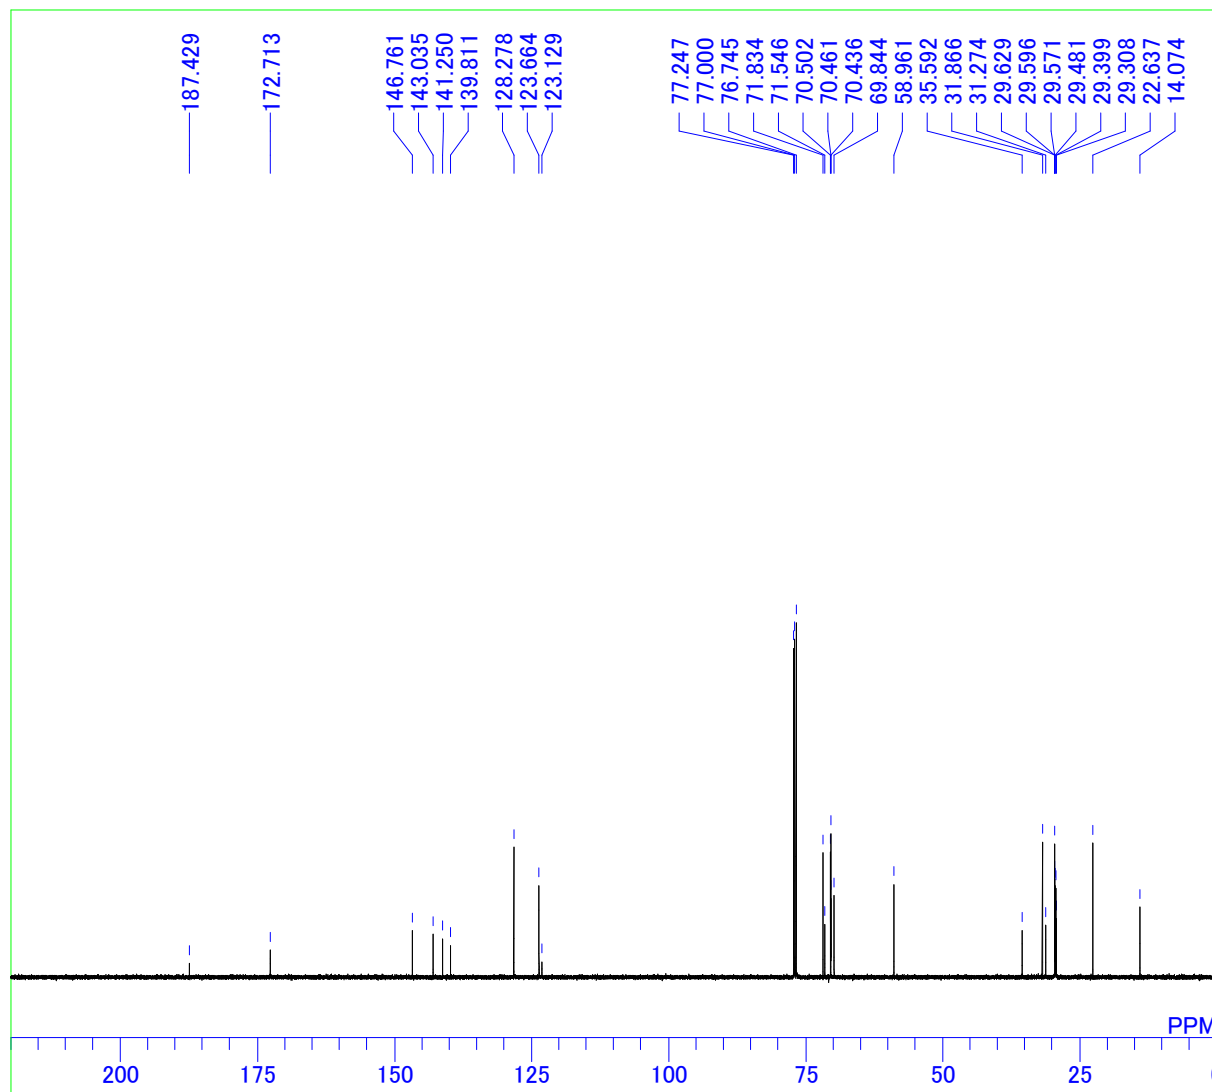

MENUF bcm\_th5atfTH5ATFG2\_2  
OBNUC 13C  
OBFRQ 125.65 MHz  
OBFIN 127958.00 Hz  
PW1 5.75 usec  
DEADT 10.00 usec  
PREDL 0.20000 msec  
INIWT 10.0000 msec  
POINT 32768  
SAMPO 32768  
TIMES 22000  
DUMMY 1  
FREQU 33898.30 Hz  
FILTR 16950 Hz  
DELAY 11.80 usec  
ACQTM 0.9667 sec  
PD 1.0000 sec  
ADBIT 16  
RGAIN 27  
BF 0.12 Hz  
T1 0.00  
T2 0.00  
T3 90.00  
T4 100.00  
EXMOD SINGL  
EXPCM Single pulse  
IRNUC 1H  
IRFRQ 500.00 MHz  
IRFIN 162410.00 Hz  
IRRPW 50 usec  
IRATN 511  
DFILE C:\Documents and Settings\ALPHA\11-11-11\UozumiG\muto\full data\PincerPd(TM6013-01-13c).als  
SHMFL TH5ATFG2\_2  
LKFIN 70334.0 Hz  
LKLEV 180  
LGAIN 21  
LKPHS 212  
LKSIG 647  
CSPED 16 Hz  
FILDC  
FILDF

### <sup>1</sup>H NMR of [3,5-didodecyl-21,6-bis{N-4-(2,5,8,11-tetraoxadodecyl)phenylimino}phenyl]chloropalladium (5)

C:\Documents and Settings\ALPHA\11-11-11\UozumiG\Hamasaka\data\C12H25\_2\_Pd-Pincer\_TriEG-1H.als  
C12H25\_2\_Pd-Pincer-TriEG-1H

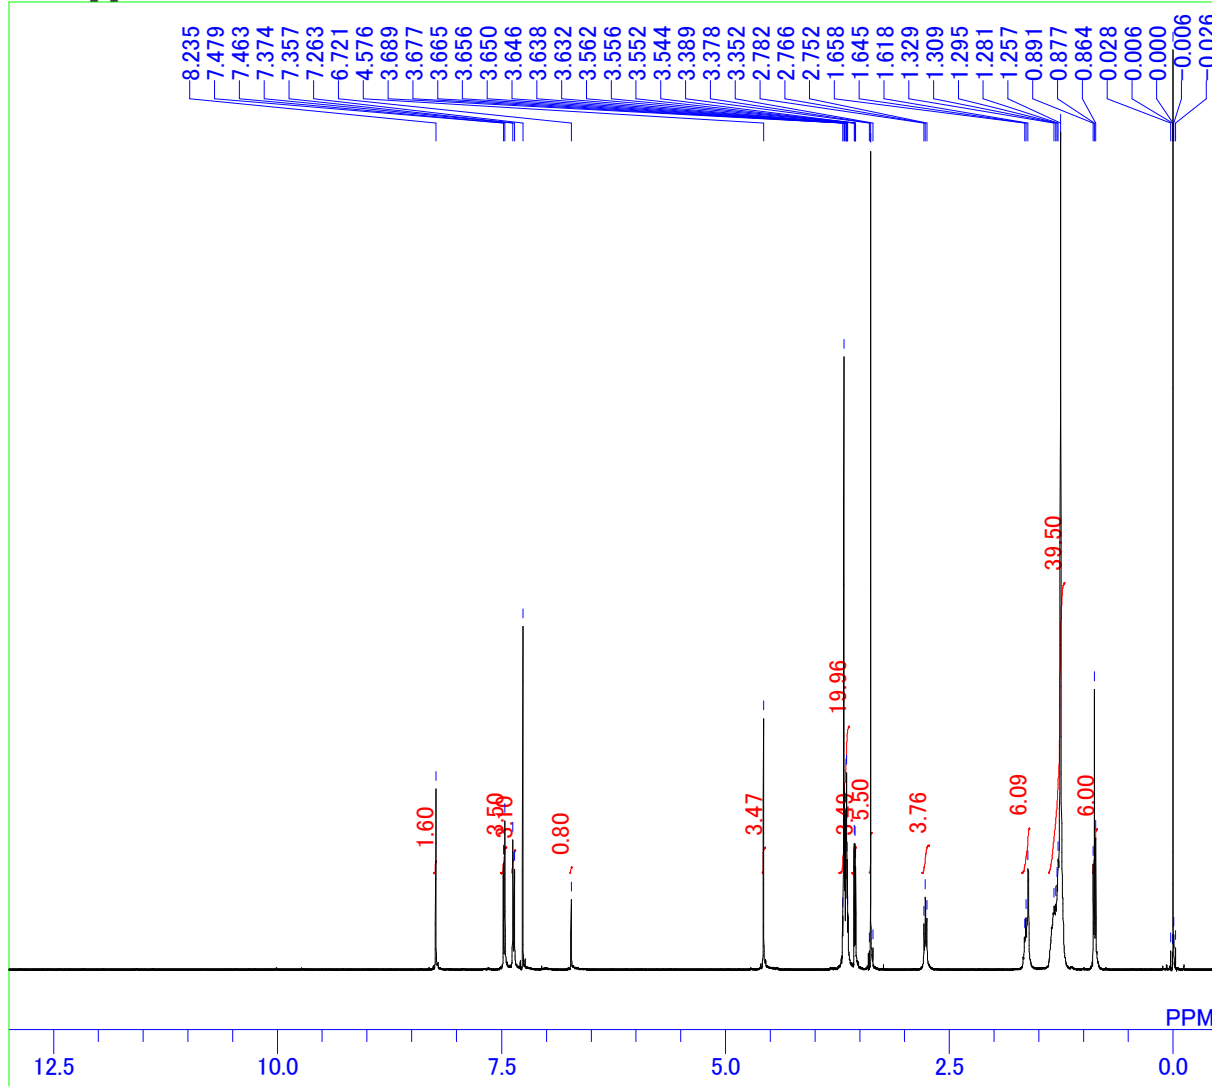

|       |                                                                         |
|-------|-------------------------------------------------------------------------|
| MENUF | non_th5atfTH5ATFG2                                                      |
| OBNUC | 1H                                                                      |
| OBFRQ | 500.00 MHz                                                              |
| OBFIN | 162410.00 Hz                                                            |
| PW1   | 6.40 usec                                                               |
| DEADT | 56.80 usec                                                              |
| PREDL | 0.20000 msec                                                            |
| INIWT | 10.0000 msec                                                            |
| POINT | 16384                                                                   |
| SAMPO | 16384                                                                   |
| TIMES | 16                                                                      |
| DUMMY | 1                                                                       |
| FREQU | 10000.00 Hz                                                             |
| FILTR | 5000 Hz                                                                 |
| DELAY | 40.00 usec                                                              |
| ACQTM | 10.0000 sec                                                             |
| PD    | 12.0000 sec                                                             |
| ADBIT | 16                                                                      |
| RGAIN | 17                                                                      |
| BF    | 0.00 Hz                                                                 |
| T1    | 0.00                                                                    |
| T2    | 0.00                                                                    |
| T3    | 90.00                                                                   |
| T4    | 100.00                                                                  |
| EXMOD | SINGL                                                                   |
| EXPCM | Single pulse                                                            |
| IRNUC | 1H                                                                      |
| IRFRQ | 500.00 MHz                                                              |
| IRFIN | 162410.00 Hz                                                            |
| IRRPW | 50 usec                                                                 |
| IRATN | 511                                                                     |
| DFILE | C:\Documents and Settings\ALPHA\11-11-11\UozumiG\Hamasaka\data\TH5ATFG2 |
| SHMFL | TH5ATFG2                                                                |
| LKFIN | 70334.0 Hz                                                              |
| LKLEV | 180                                                                     |
| LGAIN | 24                                                                      |
| LKPHS | 214                                                                     |
| LKSIG | 1656                                                                    |
| CSPED | 13 Hz                                                                   |
| FILDC |                                                                         |
| FILDF |                                                                         |

# <sup>1</sup>H NMR of [3,5-didodecyl-21,6-bis{N-4-(2,5,8,11-tetraoxadodecyl)phenylimino}phenyl]chloropalladium (5)

C:\Documents and Settings\ALPHA\1-1-1-1\UozumiG\Hamasaka\data\C12H25\_2\_Pd-Pincer\_TriEG-13C.als  
C12H25\_2\_Pd-Pincer\_TriEG-13C

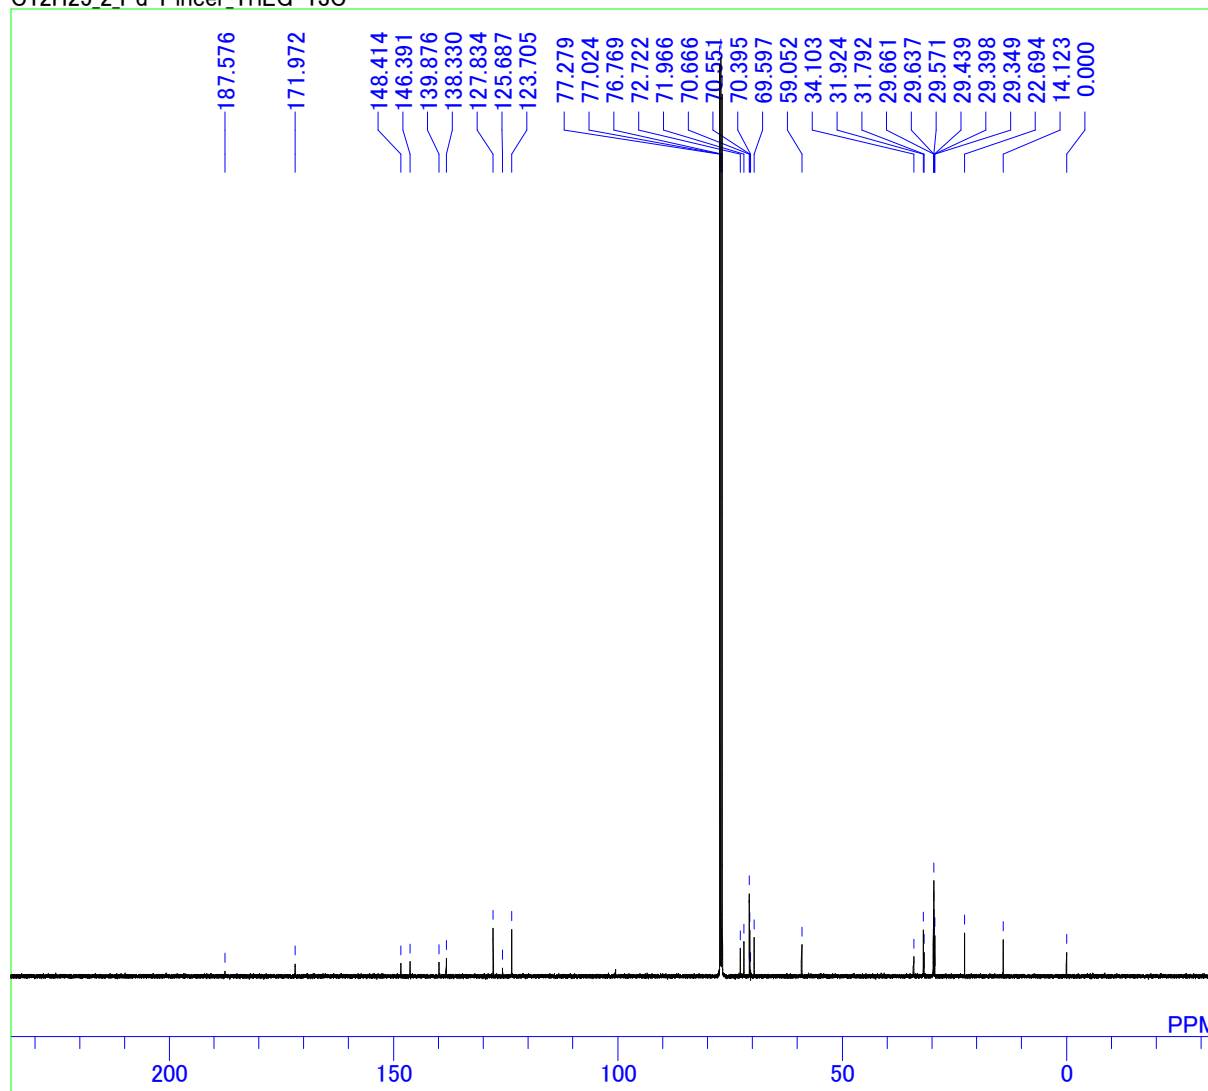

MENUF bcm\_th5atfTH5ATFG2  
OBNUC 13C  
OBFRQ 125.65 MHz  
OBFIN 127958.00 Hz  
PW1 5.75 usec  
DEADT 10.00 usec  
PREDL 0.20000 msec  
INIWT 10.0000 msec  
POINT 32768  
SAMPO 32768  
TIMES 40000  
DUMMY 1  
FREQU 33898.30 Hz  
FILTR 16950 Hz  
DELAY 11.80 usec  
ACQTM 0.9667 sec  
PD 1.0000 sec  
ADBIT 16  
RGAIN 27  
BF 0.50 Hz  
T1 0.00  
T2 0.00  
T3 90.00  
T4 100.00  
EXMOD SINGL  
EXPCM Single pulse  
IRNUC 1H  
IRFRQ 500.00 MHz  
IRFIN 162410.00 Hz  
IRRPW 50 usec  
IRATN 511  
DFILE C:\Documents and Settings\ALPHA\1  
SHMFL TH5ATFG2  
LKFIN 70334.0 Hz  
LKLEV 180  
LGAIN 23  
LKPHS 214  
LKSIG 813  
CSPED 16 Hz  
FILDC  
FILDF
